# Supplementary material for: Identification of miRNA-mediated drought responsive multi-tiered regulatory network in drought tolerant rice, Nagina 22
Source: PubMed Central journal article supplement (PMC5684420; doi:10.1038/s41598-017-15450-1), 2017-11-13
Supplement: 41598_2017_15450_MOESM1_ESM.pdf [file 41598_2017_15450_MOESM1_ESM.pdf]

## **Supplementary Information**

**Identification of miRNA-mediated drought responsive multi-tiered regulatory network in drought tolerant rice, Nagina 22**

**Sonia Balyan<sup>1</sup>, Mukesh Kumar<sup>1</sup>, Roseeta Devi Mutum<sup>1</sup>, Utkarsh Raghuvanshi<sup>1</sup>, Priyanka Agarwal<sup>1</sup>, Saloni Mathur<sup>2</sup>, Saurabh Raghuvanshi<sup>1\*</sup>**

## Supplementary Information

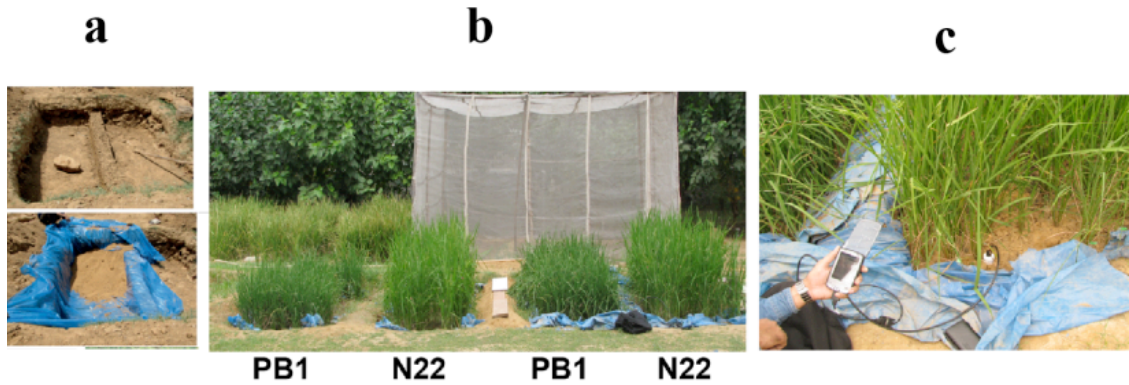

**Supplementary Fig. S1.** Field set up for implicating drought stress on rice cultivars. (a) Three feet deep pits were lined with polyethene were prepared to regulate water supply and avoid the water leakage from outside. (b) N22 and PB1 plants growing in the specially designed fields. (c) Picture showing the measurement of soil moisture content in the fields.

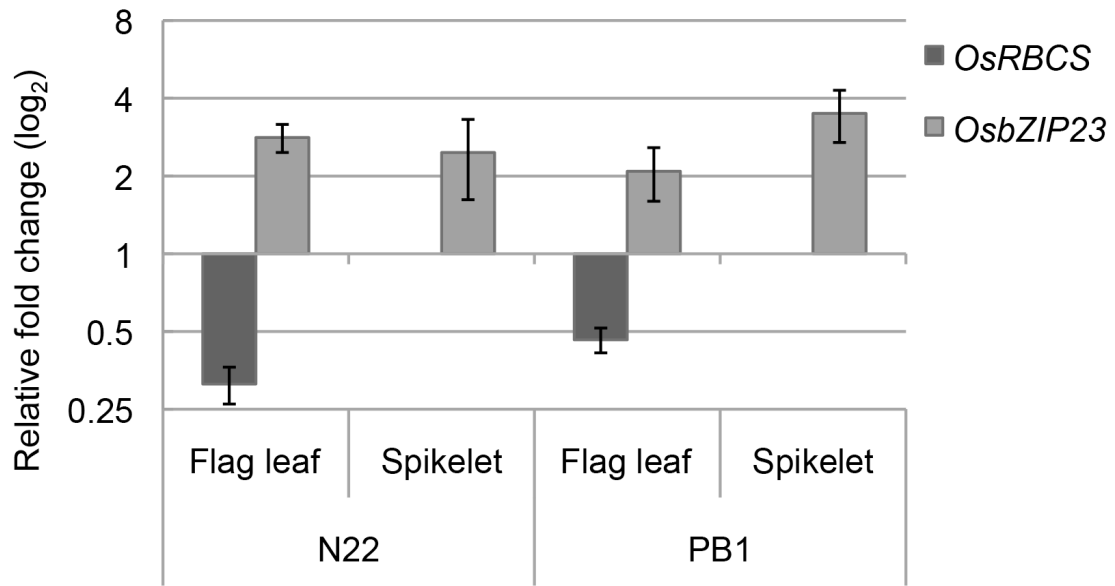

**Supplementary Fig. S2.** qRT-PCR analysis of Rubisco small sub-unit (*RBCS*) in flag leaf and *OsbZIP23* in flag leaf and spikelet of N22 and PB1 under drought stress at heading stage. Four biological replicate were performed and the standard error is represented as error bar on the top of the bar.

**a**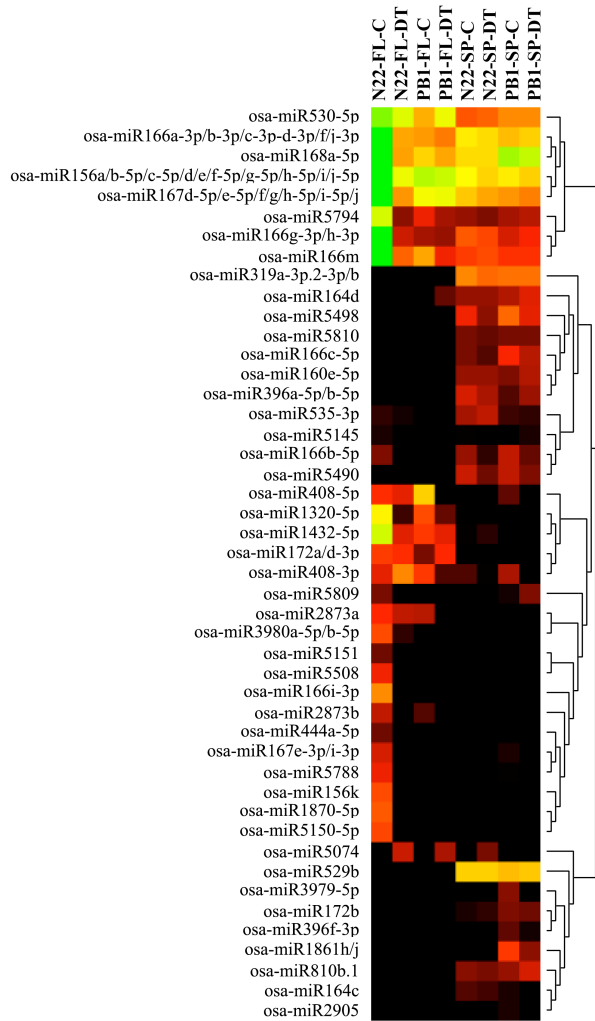**b**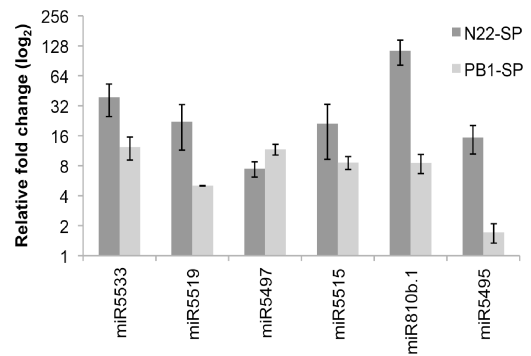

**Supplementary Fig. S3. Flag leaf and spikelet preferential miRNAs in N22 and PB1.** (a) Hierarchical clustering of  $\log_2$  transformed expression levels (TPM) of flag leaf and spikelet enriched miRNAs (having 10 fold higher expression in one tissue w.r.t to the other) in N22 and PB1. The clustering was performed using the Euclidean distance algorithm with average linkage. (b) qRT-PCR analysis of spikelets enriched miRNAs in spikelets relative to the expression in flag leaf of N22 and PB1, respectively. The expression represents the data of 3 biological replicates with three technical repeats. The error bar represents the standard error. FL- flag leaf; SP- spikelet; C- control; DT- drought.

**a**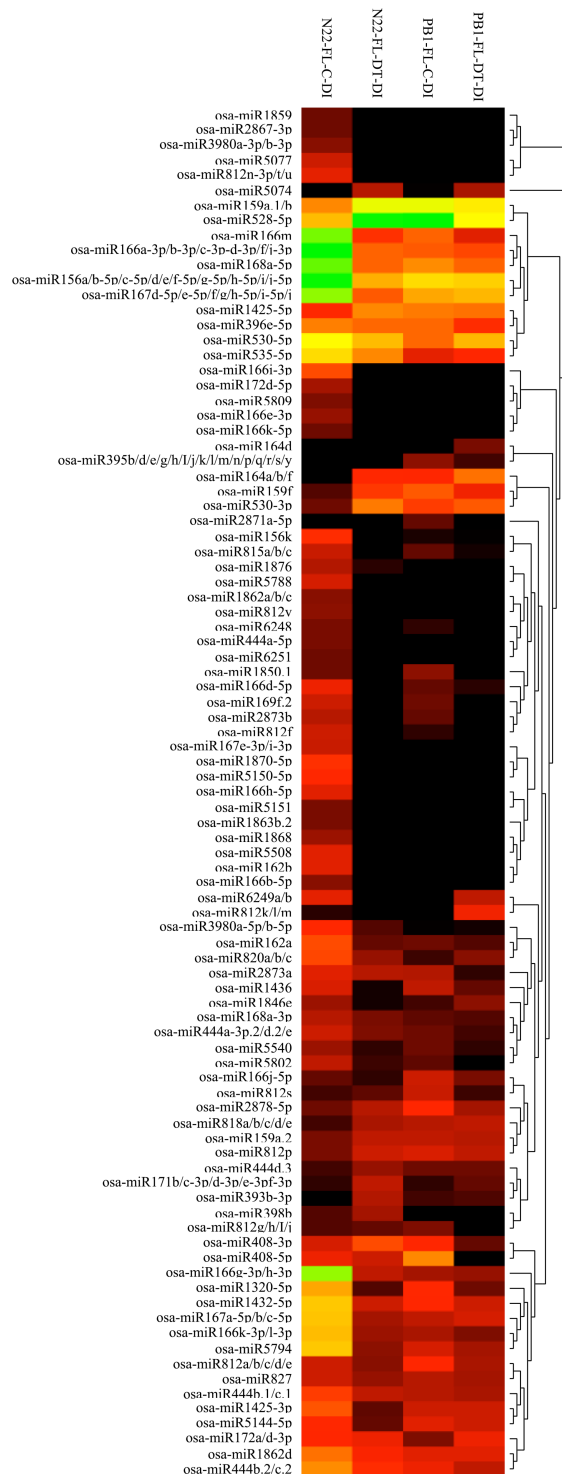**b**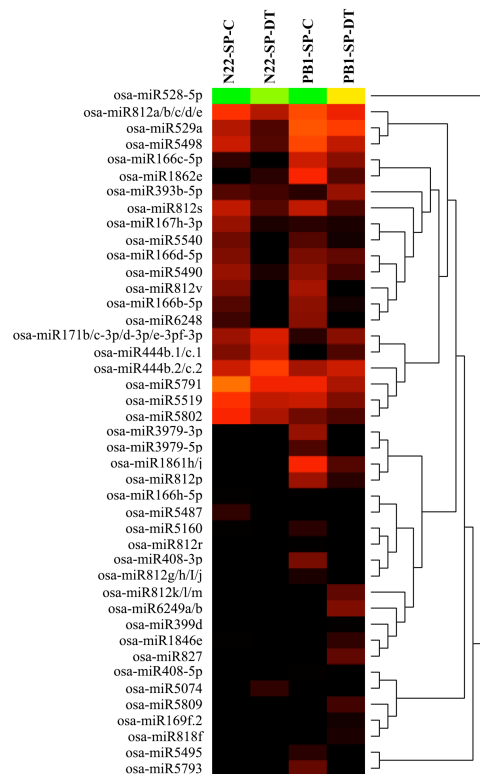

**Supplementary Fig. S4. Drought regulated miRNAs in flag leaf and spikelet.** Hierarchical clustering of  $\log_2$  transformed expression levels (TPM) of drought responsive miRNAs in flag leaf (**a**) and spikelet (**b**) of N22 and PB1. miRNAs with  $\geq 2$  fold up/down regulation in flag leaf of spikelet drought samples w.r.t. respective control in N22 and PB1. The clustering was performed using the Euclidean distance algorithm with average linkage.

### Biological Process

|                                                                                                                 |     |
|-----------------------------------------------------------------------------------------------------------------|-----|
| Adaxial/abaxial axis specification                                                                              | 2   |
| adaxial/abaxial pattern specification                                                                           | 2   |
| Adventitious root development                                                                                   | 3   |
| Anatomical structure development                                                                                | 38  |
| ATP synthesis coupled proton transport                                                                          | 3   |
| Auxin metabolic process                                                                                         | 3   |
| Auxin polar transport                                                                                           | 4   |
| auxin-activated signaling pathway                                                                               | 9   |
| Biological process                                                                                              | 299 |
| Biosynthetic process                                                                                            | 118 |
| Catabolic process                                                                                               | 43  |
| Cellular amino acid metabolic process                                                                           | 18  |
| Cellular carbohydrate metabolic process                                                                         | 3   |
| Cellular component assembly                                                                                     | 19  |
| Cellular nitrogen compound metabolic process                                                                    | 85  |
| Chlorophyll metabolic process                                                                                   | 3   |
| Cinnamic acid biosynthetic process                                                                              | 2   |
| Cofactor metabolic process                                                                                      | 13  |
| Defense response to bacterium                                                                                   | 10  |
| Determination of bilateral symmetry                                                                             | 5   |
| Electron transport chain                                                                                        | 3   |
| embryo development                                                                                              | 15  |
| embryo development ending in seed dormancy                                                                      | 11  |
| embryonic pattern specification                                                                                 | 4   |
| Endonucleolytic cleavage in ITS1 to separate SSU-rna from 5.8S rna and LSU-rna from tricistronic rna transcript | 2   |
| SSU-rna from                                                                                                    | 2   |
| Flower development                                                                                              | 8   |
| Gene silencing by miRNA                                                                                         | 3   |
| Gene silencing by RNA                                                                                           | 5   |
| Generation of precursor metabolites and energy                                                                  | 16  |
| glycolytic process                                                                                              | 6   |
| Hydrogen peroxide biosynthetic process                                                                          | 3   |
| Innate immune response                                                                                          | 3   |
| Integument development                                                                                          | 2   |
| Leaf morphogenesis                                                                                              | 7   |
| L-phenylalanine catabolic process                                                                               | 2   |
| Macromolecular complex assembly                                                                                 | 16  |
| Malate metabolic process                                                                                        | 3   |
| Meristem initiation                                                                                             | 5   |
| modulation by virus of host morphology or physiology                                                            | 2   |
| Mrna transport                                                                                                  | 2   |
| Photorespiration                                                                                                | 7   |
| Phylome development                                                                                             | 2   |
| Polarity specification of adaxial/abaxial axis                                                                  | 4   |
| Posttranscriptional gene silencing                                                                              | 3   |
| Primary cell wall biogenesis                                                                                    | 2   |
| Primary shoot apical meristem specification                                                                     | 4   |
| Proteasome core complex assembly                                                                                | 4   |
| Protein complex assembly                                                                                        | 12  |
| Protein folding                                                                                                 | 12  |
| Proteolysis involved in cellular protein catabolic process                                                      | 5   |
| Proton transport                                                                                                | 4   |
| Purine nucleotide transport                                                                                     | 2   |
| Pyridoxine biosynthetic process                                                                                 | 2   |
| Radial pattern formation                                                                                        | 2   |
| Regulation of cell cycle process                                                                                | 3   |
| Regulation of lipid metabolic process                                                                           | 2   |
| Regulation of photomorphogenesis                                                                                | 2   |
| response to auxin                                                                                               | 12  |
| Response to cadmium ion                                                                                         | 35  |
| Response to cold                                                                                                | 18  |
| Response to far red light                                                                                       | 7   |
| Response to fructose                                                                                            | 4   |
| response to hormone                                                                                             | 4   |
| Response to light stimulus                                                                                      | 10  |
| Response to misfolded protein                                                                                   | 5   |
| Response to salt stress                                                                                         | 18  |
| Response to stress                                                                                              | 58  |
| Response to sucrose                                                                                             | 6   |
| Ribosomal small subunit biogenesis                                                                              | 2   |
| RNA interference                                                                                                | 4   |
| shoot system development                                                                                        | 4   |
| Small molecule metabolic process                                                                                | 51  |
| Spermidine biosynthetic process                                                                                 | 2   |
| Sphingolipid biosynthetic process                                                                               | 2   |
| Stomatal lineage progression                                                                                    | 3   |
| Symbiosis, encompassing mutualism through parasitism                                                            | 7   |
| transcription, DNA-templated                                                                                    | 31  |
| Translation                                                                                                     | 27  |
| Translational elongation                                                                                        | 5   |
| Tricarboxylic acid cycle                                                                                        | 5   |
| Ubiquitin-dependent protein catabolic process                                                                   | 11  |
| Virus induced gene silencing                                                                                    | 5   |
| Vitamin B6 biosynthetic process                                                                                 | 2   |

### Cellular Component

|                                                                             |     |
|-----------------------------------------------------------------------------|-----|
| Apoplast                                                                    | 22  |
| Cell                                                                        | 237 |
| Cell wall                                                                   | 26  |
| Cellular component                                                          | 262 |
| Chloroplast                                                                 | 69  |
| Chloroplast envelope                                                        | 25  |
| Chloroplast stroma                                                          | 29  |
| Cytoplasm                                                                   | 168 |
| Cytoskeleton                                                                | 10  |
| Cytosol                                                                     | 60  |
| Cytosolic ribosome                                                          | 17  |
| Cytosolic small ribosomal subunit                                           | 8   |
| Eukaryotic translation elongation factor 1 complex                          | 2   |
| External encapsulating structure                                            | 21  |
| Extracellular region                                                        | 21  |
| Golgi apparatus                                                             | 19  |
| Intracellular                                                               | 223 |
| Membrane                                                                    | 75  |
| Mitochondrial proton-transporting ATP synthase complex, catalytic core F(1) | 2   |
| Mitochondrial respiratory chain complex I                                   | 7   |
| Mitochondrion                                                               | 38  |
| Nucleolus                                                                   | 19  |
| Nucleus                                                                     | 99  |
| Organelle                                                                   | 198 |
| Phragmoplast                                                                | 5   |
| Plasma membrane                                                             | 69  |
| Plasmodesma                                                                 | 21  |
| Plastid                                                                     | 69  |
| Proteasome complex                                                          | 6   |
| Proteasome core complex                                                     | 5   |
| Proteasome core complex, alpha-subunit complex                              | 3   |
| Protein complex                                                             | 39  |
| Ribonucleoprotein complex                                                   | 13  |
| Ribosome                                                                    | 25  |
| Stromule                                                                    | 6   |
| Vacuole                                                                     | 33  |

### Molecular Function

|                                                                                       |     |
|---------------------------------------------------------------------------------------|-----|
| 2 iron, 2 sulfur cluster binding                                                      | 5   |
| Ammonia-lyase activity                                                                | 2   |
| ATP:ADP antiporter activity                                                           | 2   |
| Copper ion binding                                                                    | 14  |
| Endopeptidase activity                                                                | 5   |
| Endoribonuclease activity                                                             | 4   |
| Hydrogen-translocating pyrophosphatase activity                                       | 2   |
| Inositol phosphoceramide synthase activity                                            | 2   |
| Iron-sulfur cluster binding                                                           | 6   |
| Lipid binding                                                                         | 11  |
| L-malate dehydrogenase activity                                                       | 3   |
| Malate dehydrogenase activity                                                         | 3   |
| Mirna binding                                                                         | 3   |
| Molecular function                                                                    | 344 |
| Oxidoreductase activity, acting on the CH-OH group of donors, NAD or NADP as acceptor | 6   |
| Phenylalanine ammonia-lyase activity                                                  | 2   |
| Phospholipid binding                                                                  | 5   |
| Protein domain specific binding                                                       | 2   |
| RNA binding                                                                           | 27  |
| Sirna binding                                                                         | 3   |
| Structural constituent of ribosome                                                    | 20  |
| Structural molecule activity                                                          | 25  |
| Threonine-type endopeptidase activity                                                 | 5   |
| transcription factor binding                                                          | 3   |

P-value 0.01

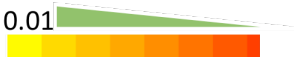

**Supplementary Fig. S5. Gene Ontology enrichment analysis of genes targeted by miRNAs showing drought mediated downregulation in N22 flag leaf. The different GO terms with an enrichment pvalue of  $\leq 0.01$  belonging to biological process, molecular function and cellular component were shown with the number of genes and heat map representing the p-value.**

### Biological Process

|                                               |   |
|-----------------------------------------------|---|
| Cellular response to UV-B                     | 2 |
| Cysteine biosynthetic process                 | 3 |
| Multicellular organismal development          | 3 |
| Removal of superoxide radicals                | 3 |
| Response to copper ion                        | 2 |
| Response to iron ion                          | 2 |
| Response to ozone                             | 2 |
| Response to salt stress                       | 8 |
| Stomatal lineage progression                  | 2 |
| Superoxide metabolic process                  | 3 |
| Ubiquitin-dependent protein catabolic process | 4 |
| Vegetative phase change                       | 2 |
| Virus induced gene silencing                  | 2 |

### Cellular Component

|                                   |    |
|-----------------------------------|----|
| Cell                              | 46 |
| Chloroplast                       | 14 |
| Chloroplast envelope              | 7  |
| Cytoplasm                         | 32 |
| Cytosol                           | 12 |
| Cytosolic large ribosomal subunit | 3  |
| Cytosolic ribosome                | 6  |
| Intracellular                     | 41 |
| Membrane                          | 20 |
| Mitochondrial inner membrane      | 3  |
| Nucleolus                         | 6  |
| Organelle                         | 35 |
| Plastid                           | 19 |
| Ribonucleoprotein complex         | 5  |
| Ribosome                          | 8  |

### Molecular Function

|                                     |    |
|-------------------------------------|----|
| Copper ion binding                  | 14 |
| Superoxide dismutase activity       | 3  |
| Electron carrier activity           | 9  |
| Antioxidant activity                | 2  |
| Protein homodimerization activity   | 3  |
| Phosphoprotein phosphatase activity | 3  |
| Structural constituent of ribosome  | 5  |

P-value 0.01 

**Supplementary Fig. S6. Gene Ontology enrichment analysis of genes targeted by miRNAs showing drought mediated up-regulation in N22 flag leaf.** The different GO terms with an enrichment pvalue of  $\leq 0.01$  belonging to biological process, molecular function and cellular component were shown with the number of genes and heat map representing the p-value .

a

## Biological Process

|                                                            |    |
|------------------------------------------------------------|----|
| Adaxial/abaxial axis specification                         | 2  |
| adaxial/abaxial pattern specification                      | 2  |
| Biosynthetic process                                       | 35 |
| Chlorophyll metabolic process                              | 2  |
| Determination of bilateral symmetry                        | 4  |
| Embryonic pattern specification                            | 2  |
| Integument development                                     | 2  |
| Lignin biosynthetic process                                | 2  |
| Malate metabolic process                                   | 2  |
| Meristem initiation                                        | 4  |
| Polarity specification of adaxial/abaxial axis             | 4  |
| Primary shoot apical meristem specification                | 2  |
| Proteolysis involved in cellular protein catabolic process | 2  |
| Radial pattern formation                                   | 2  |
| regulation of transcription, DNA-templated                 | 14 |
| transcription, DNA-templated                               | 13 |
| Translation                                                | 8  |
| Xylem and phloem pattern formation                         | 2  |

## Cellular Component

|                           |    |
|---------------------------|----|
| Cell                      | 62 |
| Cellular_component        | 73 |
| Chloroplast               | 17 |
| Cytoplasm                 | 39 |
| Cytosol                   | 20 |
| Intracellular             | 54 |
| Membrane                  | 24 |
| Nucleolus                 | 7  |
| Nucleus                   | 30 |
| Organelle                 | 52 |
| Plasma membrane           | 25 |
| Plasmodesma               | 11 |
| Plastid                   | 18 |
| Proteasome core complex   | 2  |
| Ribonucleoprotein complex | 7  |
| Ribosome                  | 7  |
| Vacuolar membrane         | 7  |
| Vacuole                   | 10 |

## Molecular Function

|                                                                                    |   |
|------------------------------------------------------------------------------------|---|
| Copper ion binding                                                                 | 9 |
| Electron carrier activity                                                          | 8 |
| Endopeptidase activity                                                             | 2 |
| Hydrolase activity, acting on acid anhydrides, in phosphorus-containing anhydrides | 8 |
| Lipid binding                                                                      | 5 |
| Structural constituent of ribosome                                                 | 7 |
| Structural molecule activity                                                       | 7 |
| Threonine-type endopeptidase activity                                              | 2 |

b

## Biological Process

|                                            |    |
|--------------------------------------------|----|
| Aging                                      | 4  |
| Anatomical structure development           | 10 |
| Biosynthetic process                       | 18 |
| Leaf senescence                            | 2  |
| Methionine biosynthetic process            | 2  |
| regulation of transcription, DNA-templated | 13 |
| Response to cold                           | 4  |
| Response to salt stress                    | 6  |
| transcription, DNA-templated               | 7  |
| Water transport                            | 2  |

## Cellular Component

|                                           |    |
|-------------------------------------------|----|
| Cell                                      | 34 |
| Chloroplast envelope                      | 6  |
| Intracellular                             | 31 |
| Mitochondrial respiratory chain complex I | 2  |
| Mitochondrion                             | 8  |
| Organelle                                 | 27 |
| Plastid                                   | 12 |

## Molecular Function

|                                  |    |
|----------------------------------|----|
| 2 iron, 2 sulfur cluster binding | 2  |
| DNA binding                      | 14 |
| Transporter activity             | 5  |

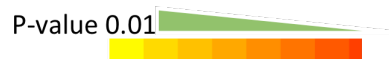

**Supplementary Fig. S7. Gene Ontology enrichment analysis of genes targeted by miRNAs showing drought mediated (a) down and (b) up-regulation in PB1 flag leaf.** The different GO terms with an enrichment pvalue of  $\leq 0.01$  belonging to biological process, molecular function and cellular component were shown with the number of genes and heat map representing the p-value.



a

| Biological Process                                                                                                                                  |    |
|-----------------------------------------------------------------------------------------------------------------------------------------------------|----|
| Biosynthetic process                                                                                                                                | 25 |
| Catabolic process                                                                                                                                   | 18 |
| Cellular amino acid biosynthetic process                                                                                                            | 3  |
| Cellular amino acid metabolic process                                                                                                               | 7  |
| Cellular nitrogen compound metabolic process                                                                                                        | 23 |
| endonucleolytic cleavage in ITS1 to separate SSU-rRNA from 5.8S rRNA and LSU-rRNA from tricistronic rRNA transcript (SSU-rRNA, 5.8S rRNA, LSU-rRNA) | 2  |
| Endonucleolytic cleavage to generate mature 3'-end of SSU-rRNA from (SSU-rRNA, 5.8S rRNA, LSU-rRNA)                                                 | 2  |
| Nitrogen compound metabolic process                                                                                                                 | 3  |
| N-terminal protein myristoylation                                                                                                                   | 2  |
| Pentose-phosphate shunt                                                                                                                             | 4  |
| Peptidyl-proline modification                                                                                                                       | 2  |
| Photorespiration                                                                                                                                    | 3  |
| Response to cadmium ion                                                                                                                             | 7  |
| Ribosomal small subunit biogenesis                                                                                                                  | 2  |
| Small molecule metabolic process                                                                                                                    | 20 |
| sulfur compound metabolic process                                                                                                                   | 5  |
| Translation                                                                                                                                         | 8  |
| Translational elongation                                                                                                                            | 4  |
| Ubiquitin-dependent protein catabolic process                                                                                                       | 5  |

| Cellular Component             |    |
|--------------------------------|----|
| Cell                           | 57 |
| Cellular component             | 63 |
| Chloroplast                    | 18 |
| Chloroplast envelope           | 7  |
| Chloroplast thylakoid membrane | 5  |
| Cytoplasm                      | 41 |
| Cytoplasmic vesicle            | 2  |
| Cytosol                        | 17 |
| Intracellular                  | 52 |
| Membrane                       | 22 |
| Organelle                      | 44 |
| Plasma membrane                | 18 |
| Plastid                        | 21 |
| Protein complex                | 13 |
| Thylakoid                      | 6  |

| Molecular Function                                                       |   |
|--------------------------------------------------------------------------|---|
| Coenzyme binding                                                         | 3 |
| Copper ion binding                                                       | 6 |
| FK506 binding                                                            | 2 |
| Hydrolase activity, acting on carbon-nitrogen (but not peptide) bonds    | 3 |
| Isomerase activity                                                       | 5 |
| Ligase activity                                                          | 6 |
| Racemase and epimerase activity, acting on carbohydrates and derivatives | 2 |
| Structural molecule activity                                             | 6 |
| Translation elongation factor activity                                   | 2 |

b

| Biological Process           |   |
|------------------------------|---|
| Biosynthetic process         | 9 |
| Transcription, DNA-templated | 5 |
| Stomatal lineage progression | 2 |

| Cellular Component |    |
|--------------------|----|
| Cytosol            | 5  |
| Intracellular      | 13 |

| Molecular Function            |   |
|-------------------------------|---|
| Transcription factor binding  | 2 |
| DNA binding                   | 7 |
| Protein dimerization activity | 3 |
| ATP binding                   | 7 |
| Helicase activity             | 3 |

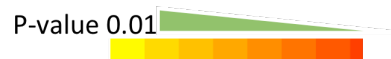

**Supplementary Fig. S8. Gene Ontology enrichment analysis of genes targeted by miRNAs showing drought mediated (a) down and (b) up-regulation in N22 spikelet.** The different GO terms with an enrichment pvalue of  $\leq 0.01$  belonging to biological process, molecular function and cellular component were shown with the number of genes and heat map representing the p-value.

a

| Biological Process                                                                                                  |    |
|---------------------------------------------------------------------------------------------------------------------|----|
| Anthocyanin-containing compound metabolic process                                                                   | 2  |
| ATP biosynthetic process                                                                                            | 2  |
| Biosynthetic process                                                                                                | 35 |
| Catabolic process                                                                                                   | 17 |
| Cellular amino acid metabolic process                                                                               | 9  |
| Cysteine biosynthetic process                                                                                       | 3  |
| Defense response to bacterium                                                                                       | 5  |
| Endonucleolytic cleavage in ITS1 to separate SSU-rRNA from 5.8S rRNA and LSU-rRNA from tricistronic rRNA transcript | 2  |
| Endonucleolytic cleavage to generate mature 3'-end of SSU-rRNA from (SSU-rRNA, 5.8S rRNA, LSU-rRNA)                 | 2  |
| Regulation of ARF GTPase activity                                                                                   | 2  |
| Ribosomal small subunit biogenesis                                                                                  | 2  |
| Salicylic acid biosynthetic process                                                                                 | 2  |
| Small molecule metabolic process                                                                                    | 22 |
| Translation                                                                                                         | 11 |
| Translational elongation                                                                                            | 5  |
| Ubiquitin-dependent protein catabolic process                                                                       | 6  |

#### Cellular Component

|                                   |    |
|-----------------------------------|----|
| Cell                              | 63 |
| Cellular component                | 71 |
| Chloroplast                       | 24 |
| Chloroplast envelope              | 9  |
| Cytoplasm                         | 43 |
| Cytosol                           | 18 |
| Cytosolic ribosome                | 6  |
| Cytosolic small ribosomal subunit | 3  |
| Intracellular                     | 56 |
| Organelle                         | 48 |
| Plastid                           | 25 |
| Ribonucleoprotein complex         | 6  |
| Ribosome                          | 8  |

#### Molecular Function

|                                                        |    |
|--------------------------------------------------------|----|
| Acid-amino acid ligase activity                        | 4  |
| ARF GTPase activator activity                          | 2  |
| Copper ion binding                                     | 10 |
| Electron carrier activity                              | 9  |
| Ligase activity                                        | 8  |
| Phosphotransferase activity, alcohol group as acceptor | 3  |
| Structural constituent of ribosome                     | 8  |
| Structural molecule activity                           | 8  |

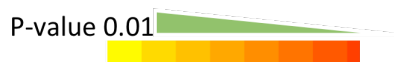

b

| Biological Process                        |    |
|-------------------------------------------|----|
| ATP synthesis coupled proton transport    | 2  |
| auxin-activated signaling pathway         | 3  |
| Biosynthetic process                      | 25 |
| Calcium-mediated signaling                | 2  |
| Cellular component assembly               | 6  |
| Cellular protein metabolic process        | 2  |
| Cellular response to nitrate              | 2  |
| Cellular response to phosphate starvation | 3  |
| Iron ion homeostasis                      | 2  |
| Lateral root development                  | 2  |
| Lateral root formation                    | 2  |
| Macromolecular complex assembly           | 6  |
| Pollen maturation                         | 2  |
| Protein complex assembly                  | 5  |
| Protein folding                           | 4  |
| Protein targeting to chloroplast          | 2  |
| Regulation of photomorphogenesis          | 2  |
| Response to cadmium ion                   | 10 |
| Response to molecule of bacterial origin  | 2  |
| Response to salt stress                   | 7  |
| Stamen development                        | 2  |

#### Cellular Component

|                                           |    |
|-------------------------------------------|----|
| Apoplast                                  | 7  |
| Cell                                      | 54 |
| Cell wall                                 | 8  |
| Cellular component                        | 60 |
| Chloroplast stroma                        | 7  |
| Cytoplasm                                 | 39 |
| Cytosol                                   | 17 |
| Extracellular region                      | 7  |
| Intracellular                             | 49 |
| Membrane                                  | 20 |
| Mitochondrial respiratory chain complex I | 3  |
| Mitochondrion                             | 11 |
| Nucleolus                                 | 6  |
| Nucleus                                   | 19 |
| Organelle                                 | 43 |
| Plasma membrane                           | 22 |
| Plasmodesma                               | 8  |
| Protein complex                           | 12 |
| SCF ubiquitin ligase complex              | 2  |
| Vacuolar membrane                         | 6  |
| Vacuole                                   | 8  |

#### Molecular Function

|                                   |   |
|-----------------------------------|---|
| Auxin binding                     | 2 |
| Inositol hexakisphosphate binding | 2 |
| Transcription factor binding      | 2 |

**Supplementary Fig. S9. Gene Ontology enrichment analysis of genes targeted by miRNAs showing drought mediated (a) down and (b) up-regulation in PB1 spikelet.** The different GO terms with an enrichment pvalue of  $\leq 0.01$  belonging to biological process, molecular function and cellular component were shown with the number of genes and heat map representing the p-value.



a.

Upstream regulatory region of MIR1871

Vandana 210 240 270 300 330 360 390 420 450 480 510 540 570 600 630 660 690 720 750 780 810 840 870 900 930 960 990 1020 1050 1080 1110 1140 1170 1200 1230 1260 1290 1320 1350 1380 1410 1440 1470 1500 1530 1560 1590 1620 1650 1680 1710 1740 1770 1800 1830 1860 1890 1920 1950 1980 2010 2040 2070 2100 2130 2160 2190 2220 2250 2280 2310 2340 2370 2400 2430 2460 2490 2520 2550 2580 2610 2640 2670 2700 2730 2760 2790 2820 2850 2880 2910 2940 2970 3000 3030 3060 3090 3120 3150 3180 3210 3240 3270 3300 3330 3360 3390 3420 3450 3480 3510 3540 3570 3600 3630 3660 3690 3720 3750 3780 3810 3840 3870 3900 3930 3960 3990 4020 4050 4080 4110 4140 4170 4200 4230 4260 4290 4320 4350 4380 4410 4440 4470 4500 4530 4560 4590 4620 4650 4680 4710 4740 4770 4800 4830 4860 4890 4920 4950 4980 5010 5040 5070 5100 5130 5160 5190 5220 5250 5280 5310 5340 5370 5400 5430 5460 5490 5520 5550 5580 5610 5640 5670 5700 5730 5760 5790 5820 5850 5880 5910 5940 5970 6000 6030 6060 6090 6120 6150 6180 6210 6240 6270 6300 6330 6360 6390 6420 6450 6480 6510 6540 6570 6600 6630 6660 6690 6720 6750 6780 6810 6840 6870 6900 6930 6960 6990 7020 7050 7080 7110 7140 7170 7200 7230 7260 7290 7320 7350 7380 7410 7440 7470 7500 7530 7560 7590 7620 7650 7680 7710 7740 7770 7800 7830 7860 7890 7920 7950 7980 8010 8040 8070 8100 8130 8160 8190 8220 8250 8280 8310 8340 8370 8400 8430 8460 8490 8520 8550 8580 8610 8640 8670 8700 8730 8760 8790 8820 8850 8880 8910 8940 8970 9000 9030 9060 9090 9120 9150 9180 9210 9240 9270 9300 9330 9360 9390 9420 9450 9480 9510 9540 9570 9600 9630 9660 9690 9720 9750 9780 9810 9840 9870 9900 9930 9960 9990 10020 10050 10080 10110 10140 10170 10200 10230 10260 10290 10320 10350 10380 10410 10440 10470 10500 10530 10560 10590 10620 10650 10680 10710 10740 10770 10800 10830 10860 10890 10920 10950 10980 11010 11040 11070 11100 11130 11160 11190 11220 11250 11280 11310 11340 11370 11400 11430 11460 11490 11520 11550 11580 11610 11640 11670 11700 11730 11760 11790 11820 11850 11880 11910 11940 11970 12000 12030 12060 12090 12120 12150 12180 12210 12240 12270 12300 12330 12360 12390 12420 12450 12480 12510 12540 12570 12600 12630 12660 12690 12720 12750 12780 12810 12840 12870 12900 12930 12960 12990 13020 13050 13080 13110 13140 13170 13200 13230 13260 13290 13320 13350 13380 13410 13440 13470 13500 13530 13560 13590 13620 13650 13680 13710 13740 13770 13800 13830 13860 13890 13920 13950 13980 14010 14040 14070 14100 14130 14160 14190 14220 14250 14280 14310 14340 14370 14400 14430 14460 14490 14520 14550 14580 14610 14640 14670 14700 14730 14760 14790 14820 14850 14880 14910 14940 14970 15000 15030 15060 15090 15120 15150 15180 15210 15240 15270 15300 15330 15360 15390 15420 15450 15480 15510 15540 15570 15600 15630 15660 15690 15720 15750 15780 15810 15840 15870 15900 15930 15960 15990 16020 16050 16080 16110 16140 16170 16200 16230 16260 16290 16320 16350 16380 16410 16440 16470 16500 16530 16560 16590 16620 16650 16680 16710 16740 16770 16800 16830 16860 16890 16920 16950 16980 17010 17040 17070 17100 17130 17160 17190 17220 17250 17280 17310 17340 17370 17400 17430 17460 17490 17520 17550 17580 17610 17640 17670 17700 17730 17760 17790 17820 17850 17880 17910 17940 17970 18000 18030 18060 18090 18120 18150 18180 18210 18240 18270 18300 18330 18360 18390 18420 18450 18480 18510 18540 18570 18600 18630 18660 18690 18720 18750 18780 18810 18840 18870 18900 18930 18960 18990 19020 19050 19080 19110 19140 19170 19200 19230 19260 19290 19320 19350 19380 19410 19440 19470 19500 19530 19560 19590 19620 19650 19680 19710 19740 19770 19800 19830 19860 19890 19920 19950 19980 20010 20040 20070 20100 20130 20160 20190 20220 20250 20280 20310 20340 20370 20400 20430 20460 20490 20520 20550 20580 20610 20640 20670 20700 20730 20760 20790 20820 20850 20880 20910 20940 20970 21000 21030 21060 21090 21120 21150 21180 21210 21240 21270 21300 21330 21360 21390 21420 21450 21480 21510 21540 21570 21600 21630 21660 21690 21720 21750 21780 21810 21840 21870 21900 21930 21960 21990 22020 22050 22080 22110 22140 22170 22200 22230 22260 22290 22320 22350 22380 22410 22440 22470 22500 22530 22560 22590 22620 22650 22680 22710 22740 22770 22800 22830 22860 22890 22920 22950 22980 23010 23040 23070 23100 23130 23160 23190 23220 23250 23280 23310 23340 23370 23400 23430 23460 23490 23520 23550 23580 23610 23640 23670 23700 23730 23760 23790 23820 23850 23880 23910 23940 23970 24000 24030 24060 24090 24120 24150 24180 24210 24240 24270 24300 24330 24360 24390 24420 24450 24480 24510 24540 24570 24600 24630 24660 24690 24720 24750 24780 24810 24840 24870 24900 24930 24960 24990 25020 25050 25080 25110 25140 25170 25200 25230 25260 25290 25320 25350 25380 25410 25440 25470 25500 25530 25560 25590 25620 25650 25680 25710 25740 25770 25800 25830 25860 25890 25920 25950 25980 26010 26040 26070 26100 26130 26160 26190 26220 26250 26280 26310 26340 26370 26400 26430 26460 26490 26520 26550 26580 26610 26640 26670 26700 26730 26760 26790 26820 26850 26880 26910 26940 26970 27000 27030 27060 27090 27120 27150 27180 27210 27240 27270 27300 27330 27360 27390 27420 27450 27480 27510 27540 27570 27600 27630 27660 27690 27720 27750 27780 27810 27840 27870 27900 27930 27960 27990 28020 28050 28080 28110 28140 28170 28200 28230 28260 28290 28320 28350 28380 28410 28440 28470 28500 28530 28560 28590 28620 28650 28680 28710 28740 28770 28800 28830 28860 28890 28920 28950 28980 29010 29040 29070 29100 29130 29160 29190 29220 29250 29280 29310 29340 29370 29400 29430 29460 29490 29520 29550 29580 29610 29640 29670 29700 29730 29760 29790 29820 29850 29880 29910 29940 29970 30000 30030 30060 30090 30120 30150 30180 30210 30240 30270 30300 30330 30360 30390 30420 30450 30480 30510 30540 30570 30600 30630 30660 30690 30720 30750 30780 30810 30840 30870 30900 30930 30960 30990 31020 31050 31080 31110 31140 31170 31200 31230 31260 31290 31320 31350 31380 31410 31440 31470 31500 31530 31560 31590 31620 31650 31680 31710 31740 31770 31800 31830 31860 31890 31920 31950 31980 32010 32040 32070 32100 32130 32160 32190 32220 32250 32280 32310 32340 32370 32400 32430 32460 32490 32520 32550 32580 32610 32640 32670 32700 32730 32760 32790 32820 32850 32880 32910 32940 32970 33000 33030 33060 33090 33120 33150 33180 33210 33240 33270 33300 33330 33360 33390 33420 33450 33480 33510 33540 33570 33600 33630 33660 33690 33720 33750 33780 33810 33840 33870 33900 33930 33960 33990 34020 34050 34080 34110 34140 34170 34200 34230 34260 34290 34320 34350 34380 34410 34440 34470 34500 34530 34560 34590 34620 34650 34680 34710 34740 34770 34800 34830 34860 34890 34920 34950 34980 35010 35040 35070 35100 35130 35160 35190 35220 35250 35280 35310 35340 35370 35400 35430 35460 35490 35520 35550 35580 35610 35640 35670 35700 35730 35760 35790 35820 35850 35880 35910 35940 35970 36000 36030 36060 36090 36120 36150 36180 36210 36240 36270 36300 36330 36360 36390 36420 36450 36480 36510 36540 36570 36600 36630 36660 36690 36720 36750 36780 36810 36840 36870 36900 36930 36960 36990 37020 37050 37080 37110 37140 37170 37200 37230 37260 37290 37320 37350 37380 37410 37440 37470 37500 37530 37560 37590 37620 37650 37680 37710 37740 37770 37800 37830 37860 37890 37920 37950 37980 38010 38040 38070 38100 38130 38160 38190 38220 38250 38280 38310 38340 38370 38400 38430 38460 38490 38520 38550 38580 38610 38640 38670 38700 38730 38760 38790 38820 38850 38880 38910 38940 38970 39000 39030 39060 39090 39120 39150 39180 39210 39240 39270 39300 39330 39360 39390 39420 39450 39480 39510 39540 39570 39600 39630 39660 39690 39720 39750 39780 39810 39840 39870 39900 39930 39960 39990 40020 40050 40080 40110 40140 40170 40200 40230 40260 40290 40320 40350 40380 40410 40440 40470 40500 40530 40560 40590 40620 40650 40680 40710 40740 40770 40800 40830 40860 40890 40920 40950 40980 41010 41040 41070 41100 41130 41160 41190 41220 41250 41280 41310 41340 41370 41400 41430 41460 41490 41520 41550 41580 41610 41640 41670 41700 41730 41760 41790 41820 41850 41880 41910 41940 41970 42000 42030 42060 42090 42120 42150 42180 42210 42240 42270 42300 42330 42360 42390 42420 42450 42480 42510 42540 42570 42600 42630 42660 42690 42720 42750 42780 42810 42840 42870 42900 42930 42960 42990 43020 43050 43080 43110 43140 43170 43200 43230 43260 43290 43320 43350 43380 43410 43440 43470 43500 43530 43560 43590 43620 43650 43680 43710 43740 43770 43800 43830 43860 43890 43920 43950 43980 44010 44040 44070 44100 44130 44160 44190 44220 44250 44280 44310 44340 44370 44400 44430 44460 44490 44520 44550 44580 44610 44640 44670 44700 44730 44760 44790 44820 44850 44880 44910 44940 44970 45000 45030 45060 45090 45120 45150 45180 45210 45240 45270 45300 45330 45360 45390 45420 45450 45480 45510 45540 45570 45600 45630 45660 45690 45720 45750 45780 45810 45840 45870 45900 45930 45960 45990 46020 46050 46080 46110 46140 46170 46200 46230 46260 46290 46320 46350 46380 46410 46440 46470 46500 46530 46560 46590 46620 46650 46680 46710 46740 46770 46800 46830 46860 46890 46920 46950 46980 47010 47040 47070 47100 47130 47160 47190 47220 47250 47280 47310 47340 47370 47400 47430 47460 47490 47520 47550 47580 47610 47640 47670 47700 47730 47760 47790 47820 47850 47880 47910 47940 47970 48000 48030 48060 48090 48120 48150 48180 48210 48240 48270 48300 48330 48360 48390 48420 48450 48480 48510 48540 48570 48600 48630 48660 48690 48720 48750 48780 48810 48840 48870 48900 48930 48960 48990 49020 49050 49080 49110 49140 49170 49200 49230 49260 49290 49320 49350 49380 49410 49440 49470 49500 49530 49560 49590 49620 49650 49680 49710 49740 49770 49800 49830 49860 49890 49920 49950 49980 50010 50040 50070 50100 50130 50160 50190 50220 50250 50280 50310 50340 50370 50400 50430 50460 50490 50520 50550 50580 50610 50640 50670 50700 50730 50760 50790 50820 50850 50880 50910 50940 50970 51000 51030 51060 51090 51120 51150 51180 51210 51240 51270 51300 51330 51360 51390 51420 51450 51480 51510 51540 51570 51600 51630 51660 51690 51720 51750 51780 51810 51840 51870 51900 51930 51960 51990 52020 52050 52080 52110 52140 52170 52200 52230 52260 52290 52320 52350 52380 52410 52440 52470 52500 52530 52560 52590 52620 52650 52680 52710 52740 52770 52800 52830 52860 52890 52920 52950 52980 53010 53040 53070 53100 53130 53160 53190 53220 53250 53280 53310 53340 53370 53400 53430 53460 53490 53520 53550 53580 53610 53640 53670 53700 53730 53760 53790 53820 53850 53880 53910 53940 53970 54000 54030 54060 54090 54120 54150 54180 54210 54240 54270 54300 54330 54360 54390 54420 54450 54480 54510 54540 54570 54600 54630 54660 54690 54720 54750 54780 54810 54840 54870 54900 54930 54960 54990 55020 55050 55080 55110 55140 55170 55200 55230 55260 55290 55320 55350 55380 55410 55440 55470 55500 55530 55560 55590 55620 55650 55680 55710 55740 55770 55800 55830 55860 55890 55920 55950 55980 56010 56040 56070 56100 56130 56160 56190 56220 56250 56280 56310 56340 56370 56400 56430 56460 56490 56520 56550 56580 56610 56640 56670 56700 56730 56760 56790 56820 56850 56880 56910 56940 56970 57000 57030 57060 57090 57120 57150 57180 57210 57240 57270 57300 57330 57360 57390 57420 57450 57480 57510 57540 57570 57600 57630 57660 57690 57720 57750 57780 57810 57840 57870 57900 57930 57960 57990 58020 58050 58080 58110 58140 58170 58200 58230 58260 58290 58320 58350 58380 58410 58440 58470 58500 58530 58560 58590 58620 58650 58680 58710 58740 58770 58800 58830 58860 58890 58920 58950 58980 59010 59040 59070 59100 59130 59160 59190 59220 59250 59280 59310 59340 59370 59400 59430 59460 59490 59520 59550 59580 59610 59640 59670 59700 59730 59760 59790 59820 59850 59880 59910 59940 59970 60000 60030 60060 60090 60120 60150 60180 60210 60240 60270 60300 60330 60360 60390 60420 60450 60480 60510 60540 60570 60600 60630 60660 60690 60720 60750 60780 60810 60840 60870 60900 60930 60960 60990 61020 61050 61080 61110 61140 61170 61200 61230 61260 61290 61320 61350 61380 61410 61440 61470 61500 61530 61560 61590 61620 61650 61680 61710 61740 61770 61800 61830 61860 61890 61920 61950 61980 62010 62040 62070 62100 62130 62160 62190 62220 62250 62280 62310 62340 62370 62400 62430 62460 62490 62520 62550 62580 62610 62640 62670 62700 62730 62760 62790 62820 62850 62880 62910 62940 62970 63000 63030 63060 63090 63120 63150 63180 63210 63240 63270













Upstream regulatory region of MIR397a

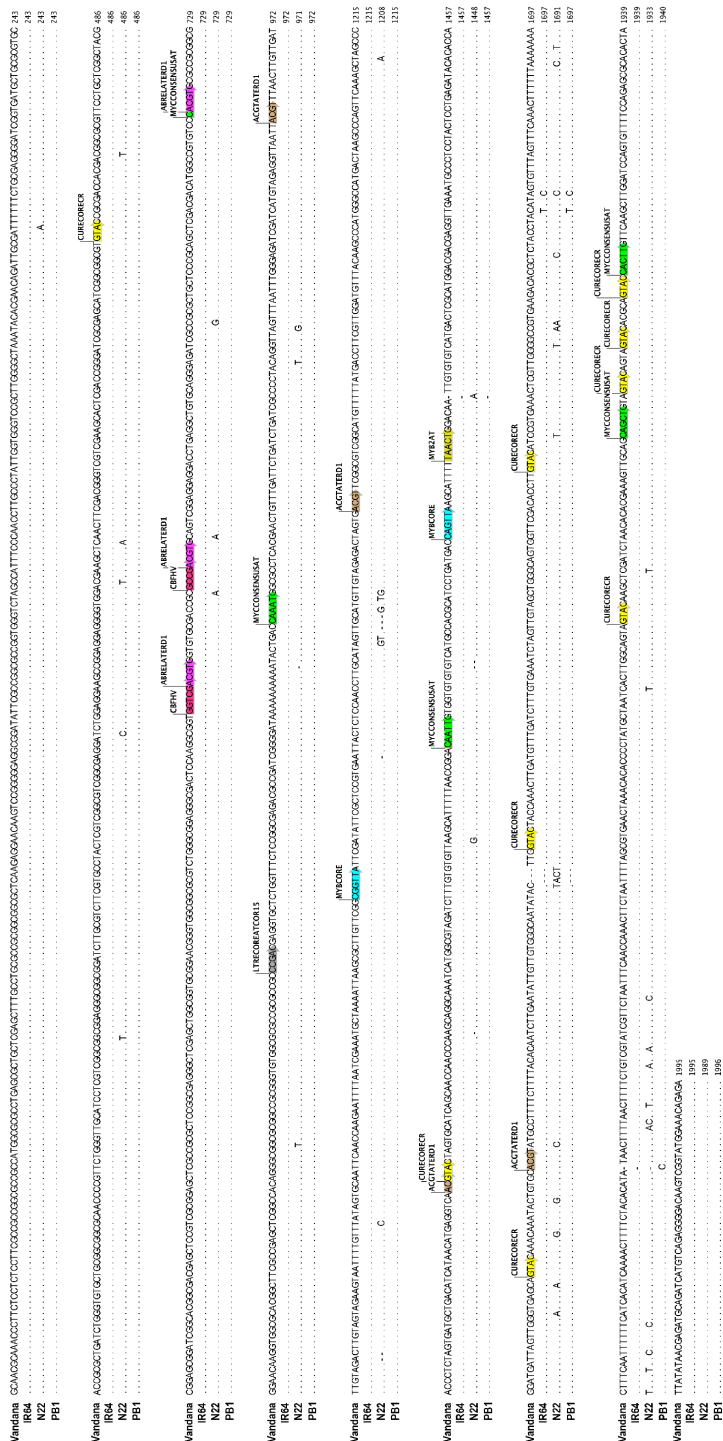

**Supplementary Fig. S11.** Sequence alignment of DTA-miRNA promoter sequences in N22, Vandana, PB1 and IR64. Sequence alignment of 2kb upstream region of (a) MIR1871, (b) MIR159f 2kb, (c) MIR2878, (d) MIR528, (e) MIR408, (f) MIR398b, (g) MIR397a in four cultivars namely N22, Vandana, PB1 and IR64. Dots (.) represents the identical sequence, dashes (-) represents gaps and the cis-acting elements associated with stress were highlighted.

a

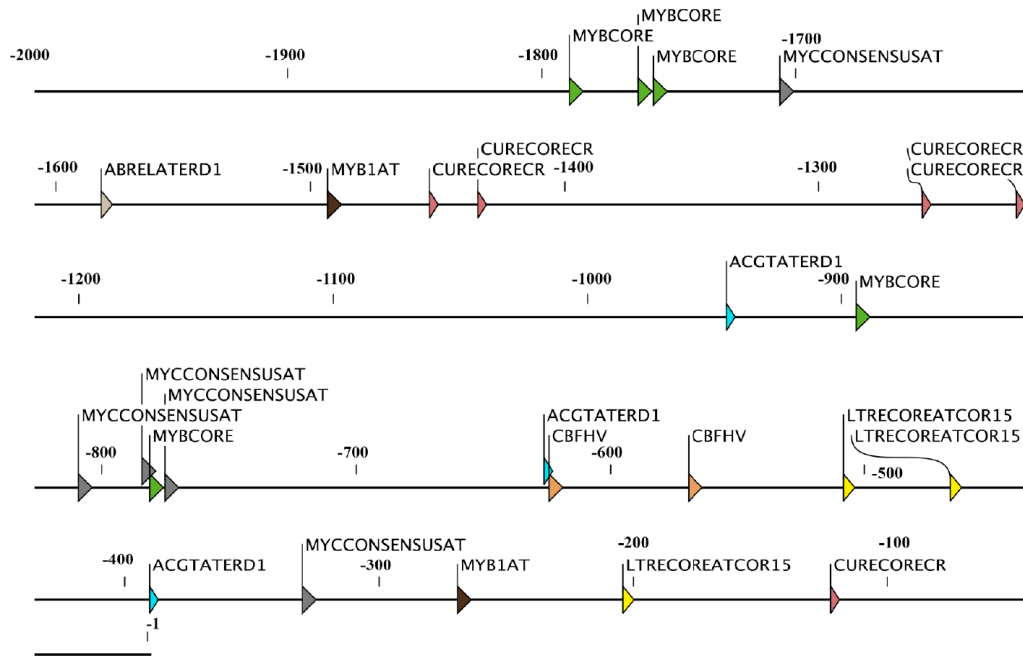

b

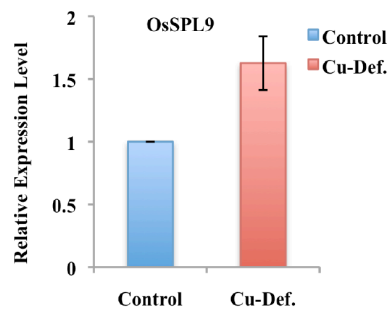

**Supplementary Fig. S12. *OsSPL9* promoter analysis** (a) Cis-regulatory elements in the 2kb upstream promoter of *OsSPL9*. (b) RT-PCR of *OsSPL9* in response to copper starvation in N22 seedlings. Data represents the mean value of three biological replicates and three technical repeats.

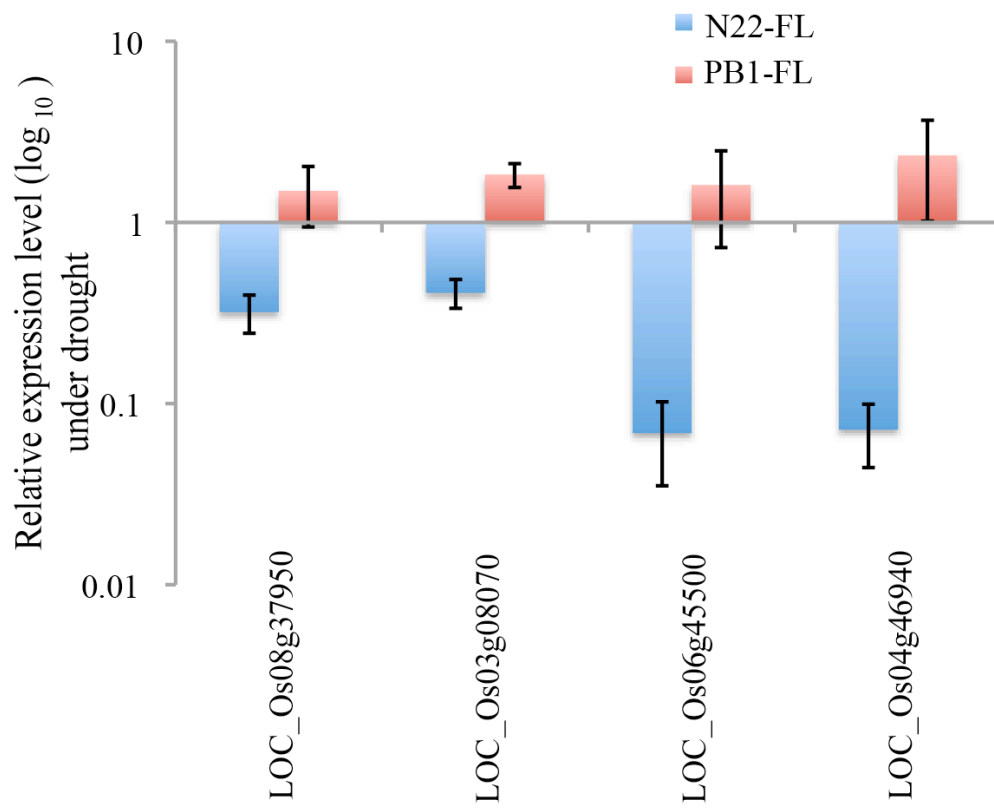

**Supplementary Fig. S13.** qRT-PCR of copper ATPases in N22 and PB1 flag leaf in response to drought. Three biological replicates were analyzed with three technical repeats. Error bars represent the standard error.

a COPT1

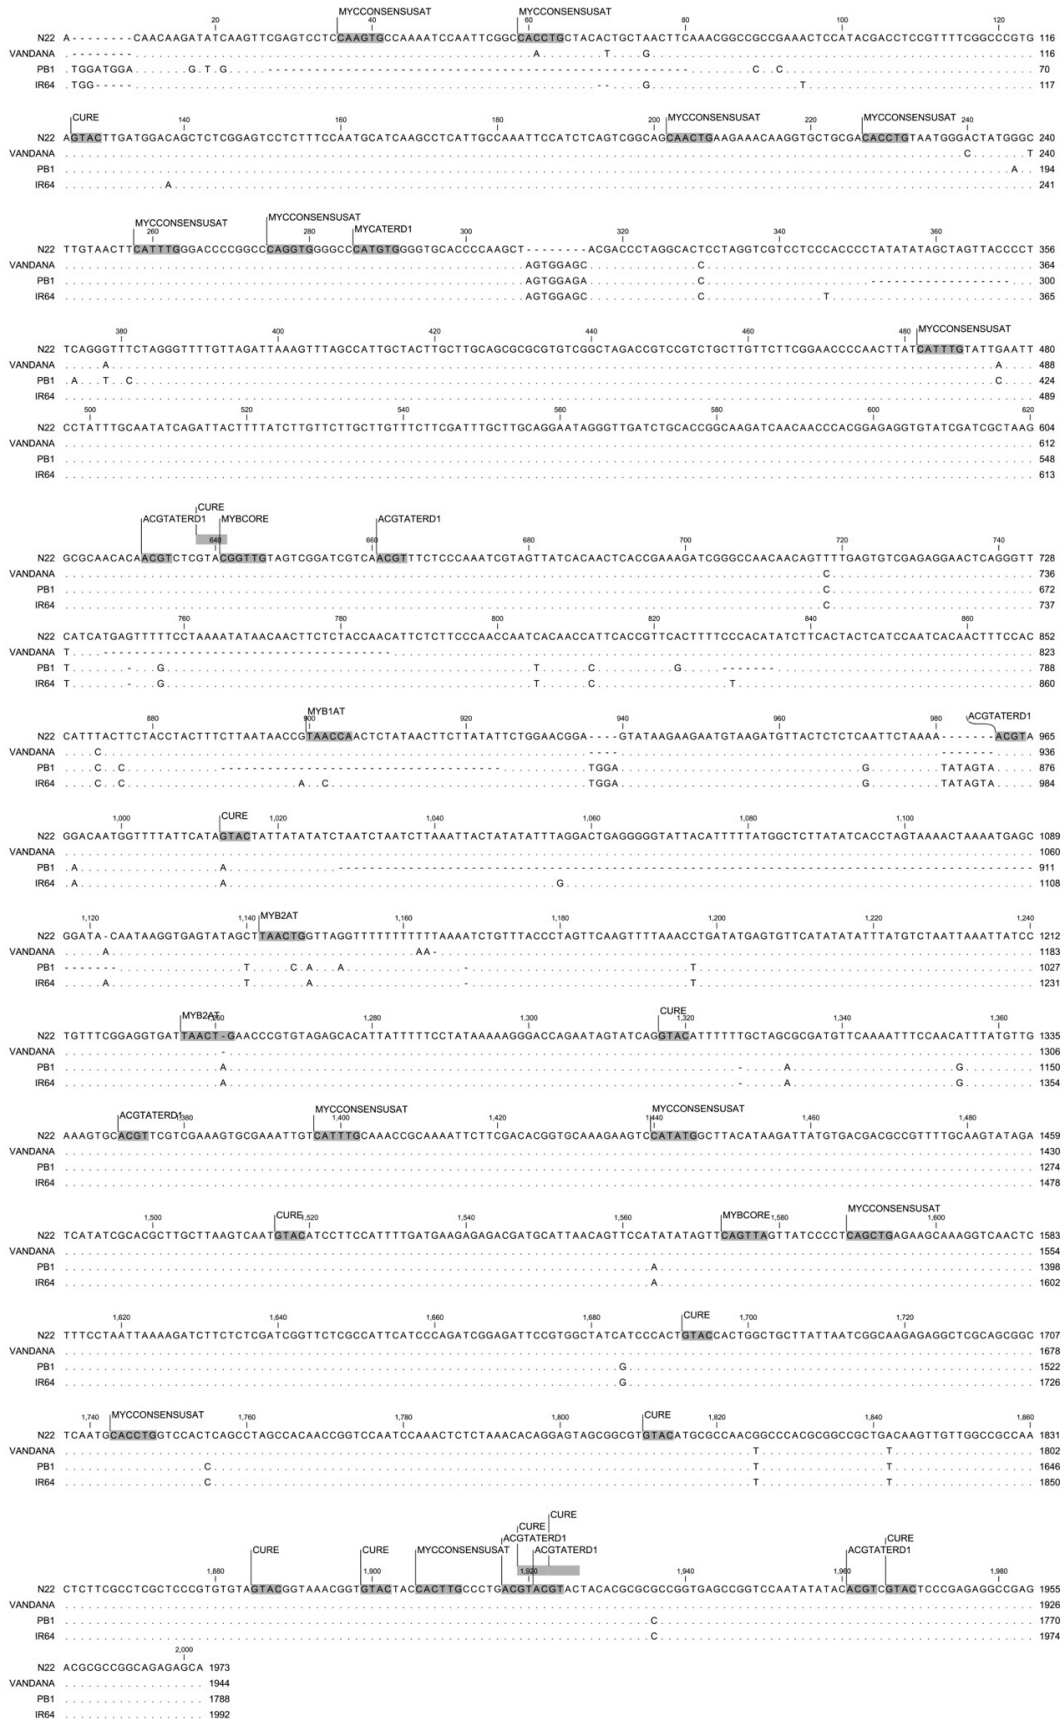

**b COPT2**

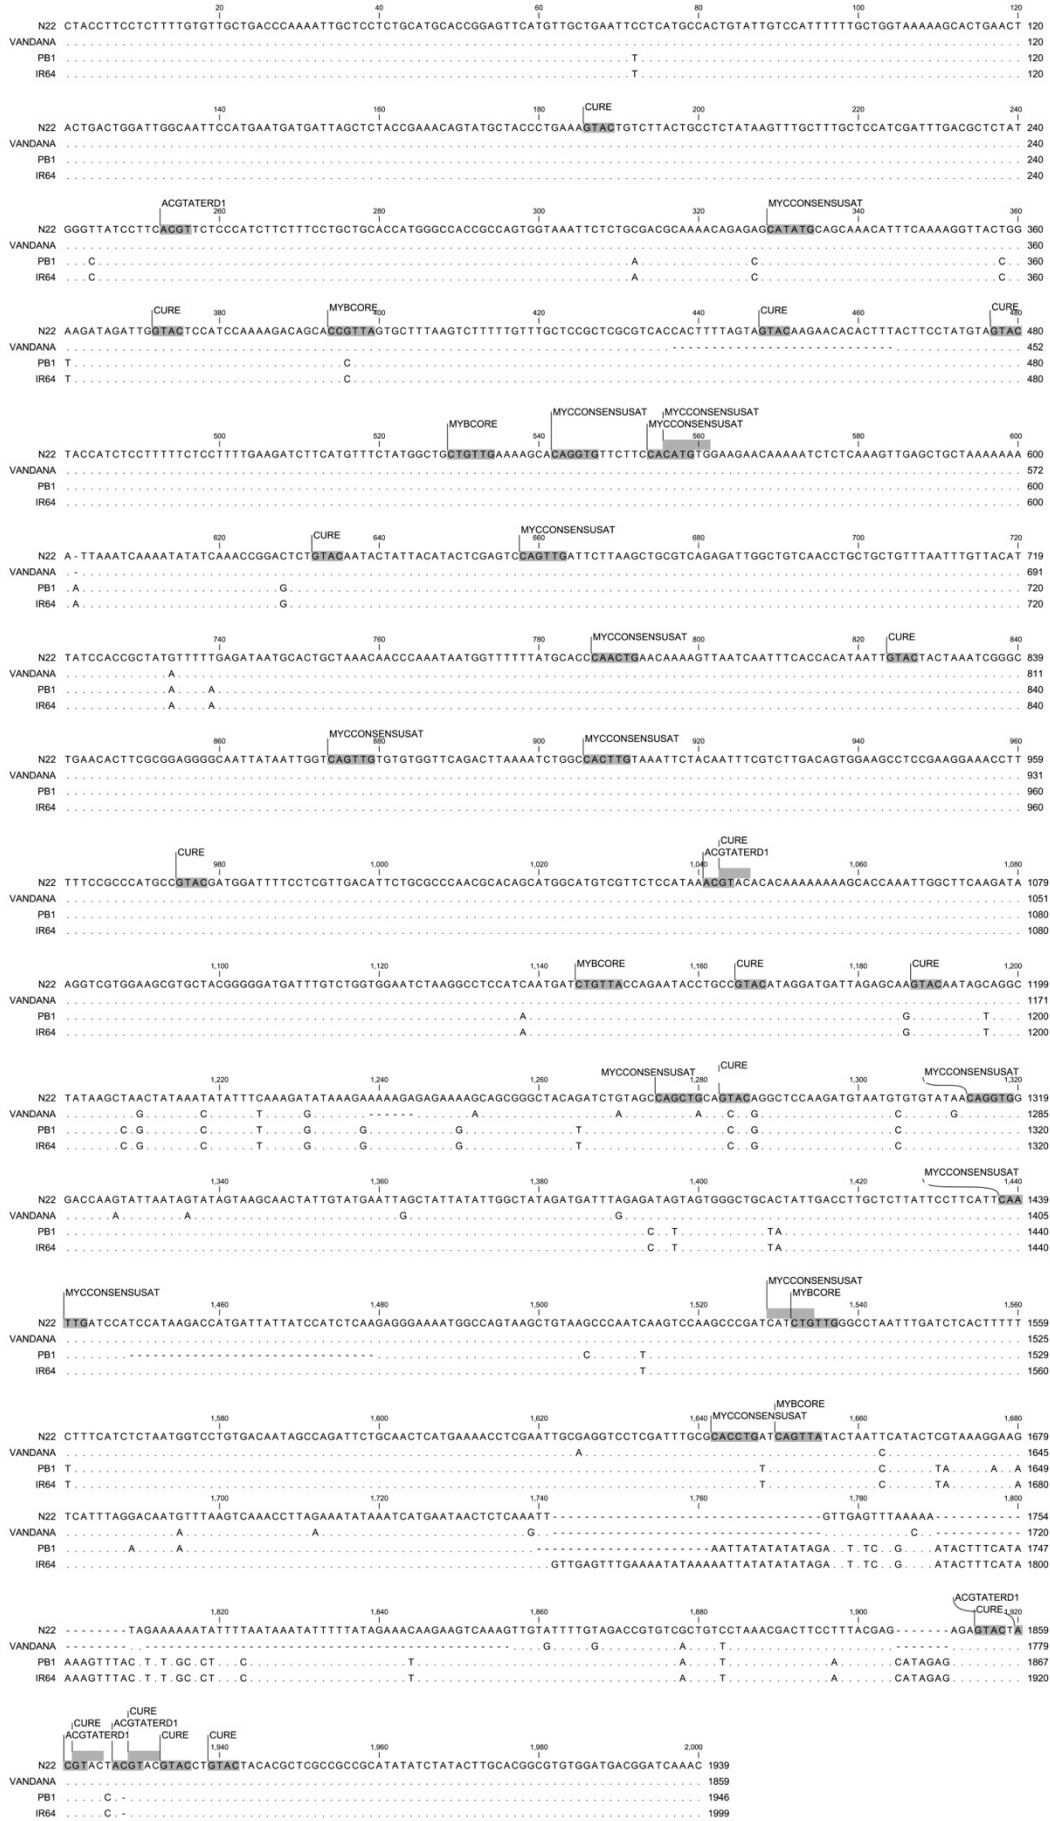

c COPT3

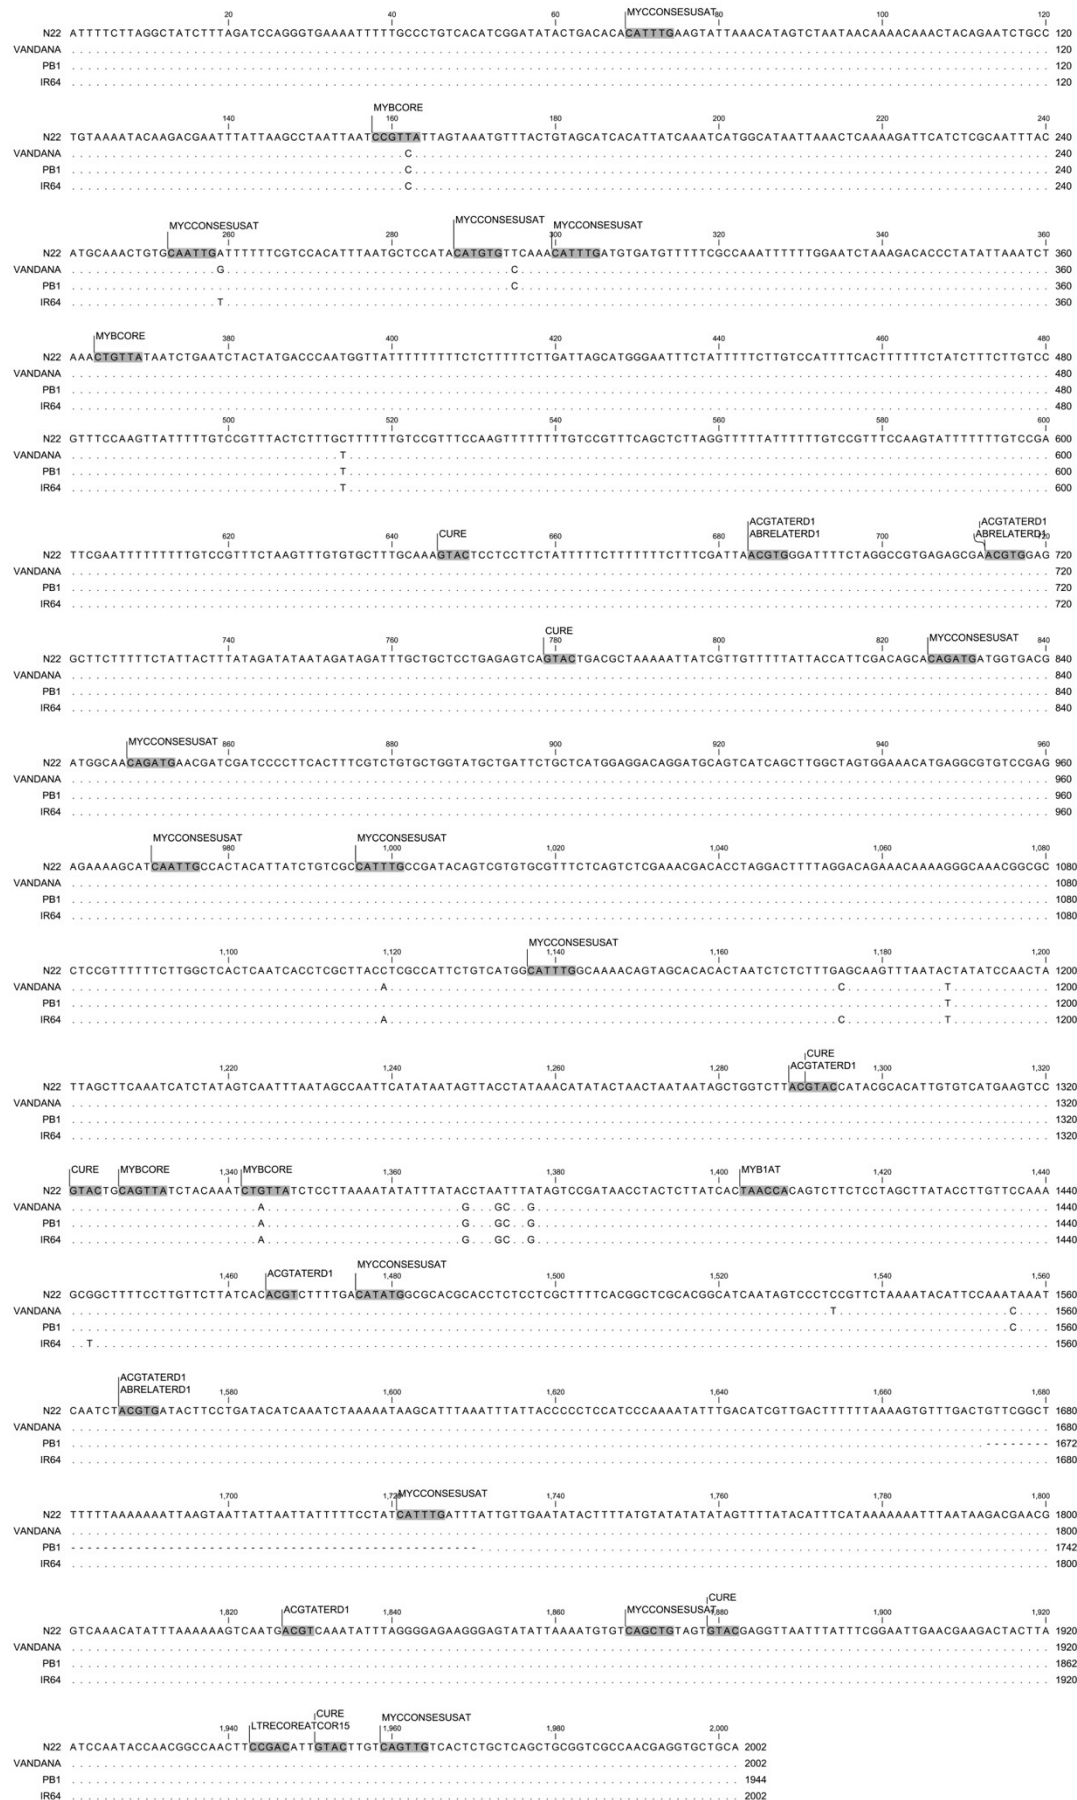

d COPT4

ACGTATERD1

CURE

N22 CTGGTACTAATAACCTTAGGATTTAATTTGTCAAATCTTTTACTTATGTTATGGTGGGTTTACACTCGTCCCTTGCTAATATCTTCCATAGTTGGCTGGTGGTTTACAACCTAGAAAT 120  
VANDANA ..... G ..... 120  
PB1 ..... 120  
IR64 ..... 120

140 160 180 200 220

CURE MYCCONSENSUSAT

N22 AAATGTTAACTTTTATAGTGGCCGTAGCTTTGTTGGACGGTAAGACTTTGTAGTAAATGATATAATCTCAATGGCTTAACTACTAACCTCCCTCTTTGTAGTAATTTCCAGTGAA 240  
VANDANA ..... 240  
PB1 ..... 240  
IR64 ..... 240

260 280 300 320 340 360

MYCCONSENSUSAT

N22 CCCACTGCGCTAGTGGCTATTGCTTAAACGAGGAAATAGCGATGTAGTAAACACATGCACAAAGTTACCGGAGGCTAGAGTTGGGATTTCTTTCCAGATTGCGTGAACCTTGAG 360  
VANDANA ..... G ..... 360  
PB1 ..... A ..... 360  
IR64 ..... A ..... 360

380 400 420 440 460 480

MYBCORE CURE

N22 TAAGCGTTGGAGACCTAGTATCCACCTTTGTCATCTTTTGTAGTGGCTCTATTACGAGACGACTTCGTTGTGAGGTGTTAGTCTAACTACCTCTGTTTATTGGTCGGTGGT 480  
VANDANA ..... 480  
PB1 ..... T ..... 480  
IR64 ..... T ..... 480

500 520 540 560 580 600

CURE ACGTATERD1

N22 GTTGTCTTATGCAAGGTGGCTGCTAACTACTATTGACAATGTATGTTGGCTATGACCTATAGTTTGGATGTAGAGGATAGGTTTTAATCATTTTTTAAAAAATAATTGACATTT 600  
VANDANA ..... T ..... 599  
PB1 ..... G ..... 599  
IR64 ..... G ..... 599

620 640 660 680 700 720

CURE ACGTATERD1

N22 TCTCCCTACATGTTTATCTATGTTTGTAGTATTGTTGCTCTCACTAAGCCTAGAGTCTCGCTAGATATAATGATTTTTTGTCTACTTGTACTCCCTCCCTACCTTCAAAT 720  
VANDANA ..... 719  
PB1 ..... 719  
IR64 ..... 719

740 760 780 800 820 840

N22 TTTTATGAGACAGACACAACTATATACAATAGGATGTTCCATCCAATCGAACAAATATATTTTGGAAATGGGAAAGTGAAGAATTA--GTTGCTAGCATATCTGCACCTTT 837  
VANDANA ..... A . C . AG . T ..... 839  
PB1 ..... A . C . G ..... 836  
IR64 ..... A . C . G ..... 836

860 880 900 920 940 960

MYBIAT DRE1COREZMRAB17

N22 CCCTCCATCCAAAATATAAAAAGGAAACTTTTGAACCACTAAACAGAGTAAACCGGACCGGAGACGAGAATAAGCCAGCGGACACCGGCAACAAGACAATAATTTTTGTTGGCA 957  
VANDANA ..... A . . C . . A . . A . . T ..... 959  
PB1 ..... A . . A . . A . . T ..... 956  
IR64 ..... A . . A . . A . . T ..... 956

980 1,000 1,020 1,040 1,060 1,080

MYBIAT

N22 TTCATCAAAAATATCCCAACATAGCATAGCTTCTAGTGGAAACTGTGAACCACTGAACCAACCACATAGACGATAGGCTTGTAGCTGCTGCAACGGACAAACCAATAAATACCC 1077  
VANDANA ..... 1079  
PB1 ..... 1076  
IR64 ..... G ..... 1076

1,100 1,120 1,140 1,160 1,180 1,200

ACGTATERD1

N22 CCTCCGTAAACCGGAGATTTCAAGTTTCAACGAAGGCTGATTTTATTCACCTCAAATATAAAGTTTGAAGAAATAGAAATGATGTACAGAAAGTTAGAAAGTTGTGTGT - AGA 1195  
VANDANA ..... G ..... 1197  
PB1 ..... A . . A . . A . . A . . GT . A . 1196  
IR64 ..... A . . A . . A . . A . . 1194

1,220 1,240 1,260 1,280 1,300 1,320

MYCCONSENSUSAT CURE

N22 AAAGTTCGATATGACGAAAAGTTAAAAGTTAAAGAAAAGTTAGAATCTAAATAGGCCAAAGCGAGAAGCTTCCTTCCAAATCCTGGCTGTGTGATATGTA---CTAGTACT 1311  
VANDANA ..... G ..... 1313  
PB1 ..... G ..... 1286  
IR64 ..... G ..... 1314

1,340 1,360 1,380 1,400 1,420 1,440

N22 CCTTCGCTCAGTAAGTTAATTTTTTATT - TTTTCTATTTATCCAAAATAAATTTATTTTTAAGTAATAATTTGATCAAAATGATGAAAGTAGAAAATAATATATTGGAATAG 1430  
VANDANA ..... T . A . . T ..... 1430  
PB1 ..... T . A . . T ..... 1400  
IR64 ..... G ..... 1431

1,460 1,480 1,500 1,520 1,540 1,560

MYBCORE

N22 AATAATGAGAAATAGTTGCATTGCATTTGATAAAGCAAAAGTATTTAGTTTTTATGATAAATGTAAGAAAGATACTACTCCTCCGTTAAAAAATAAATCTAGAACAGGATA 1550  
VANDANA ..... A ..... 1546  
PB1 ..... A ..... 1520  
IR64 ..... A ..... 1551

1,580 1,600 1,620 1,640 1,660 1,680

CURE

N22 TGACACATTCTACTAAT ..... A ..... GCACACCACACACACCAGCAACGGGGATTAGAAGTTGACACGA 1615  
VANDANA ..... AAATATGAACAAAGATATCTAGCACACTGC CACGACACACACACCAGCAACGGGG ..... G ..... 1665  
PB1 ..... A . T . T ..... TATG ..... CTGCACACTGC CACGACACACACACCAGCAACGGGG ..... G ..... 1626  
IR64 ..... A . T . T ..... AATATAACAAAGATATATGTTTAG ..... G ..... 1641

1,700 1,720 1,740 1,760 1,780 1,800

MYCCONSENSUSAT MYBCORE

N22 CTGTCTACTGGAATCCTAGCTGTGCTGCGGTAGCACTGTCTCAGATGCTGATACTCCTGATAGCCATAGCCACGACGGATGGGTCCCATCCATCCTCCCTCCTGTCCGTTG 1735  
VANDANA ..... 1785  
PB1 ..... 1746  
IR64 ..... 1761

1,820 1,840 1,860 1,880 1,900 1,920

ACGTATERD1

N22 TTTTGGCTCAGGTTCAAGTTCAGTGCAGTACAGGCGGGACGCCCAAAAACTGCCACGCTGTGTGCCGCGCGCCACCGGATCCCCTGATCCCATTAACGTTTACCCGCGCGCC 1855  
VANDANA ..... 1905  
PB1 ..... 1866  
IR64 ..... 1881

1,940 1,960 1,980

MYCCONSENSUSAT

N22 CACCTGCCGCTGCAATATTTTATTT - - CGCCGGCC - - CGCGCCACGCCACCTTGCCGCGCGCCGACA 1922  
VANDANA ..... CGCCGGC . C . . ACG . A ..... G . . 1978  
PB1 ..... CGCCGGC . C . . ..... G . . 1936  
IR64 ..... G . . 1948



e COPT5

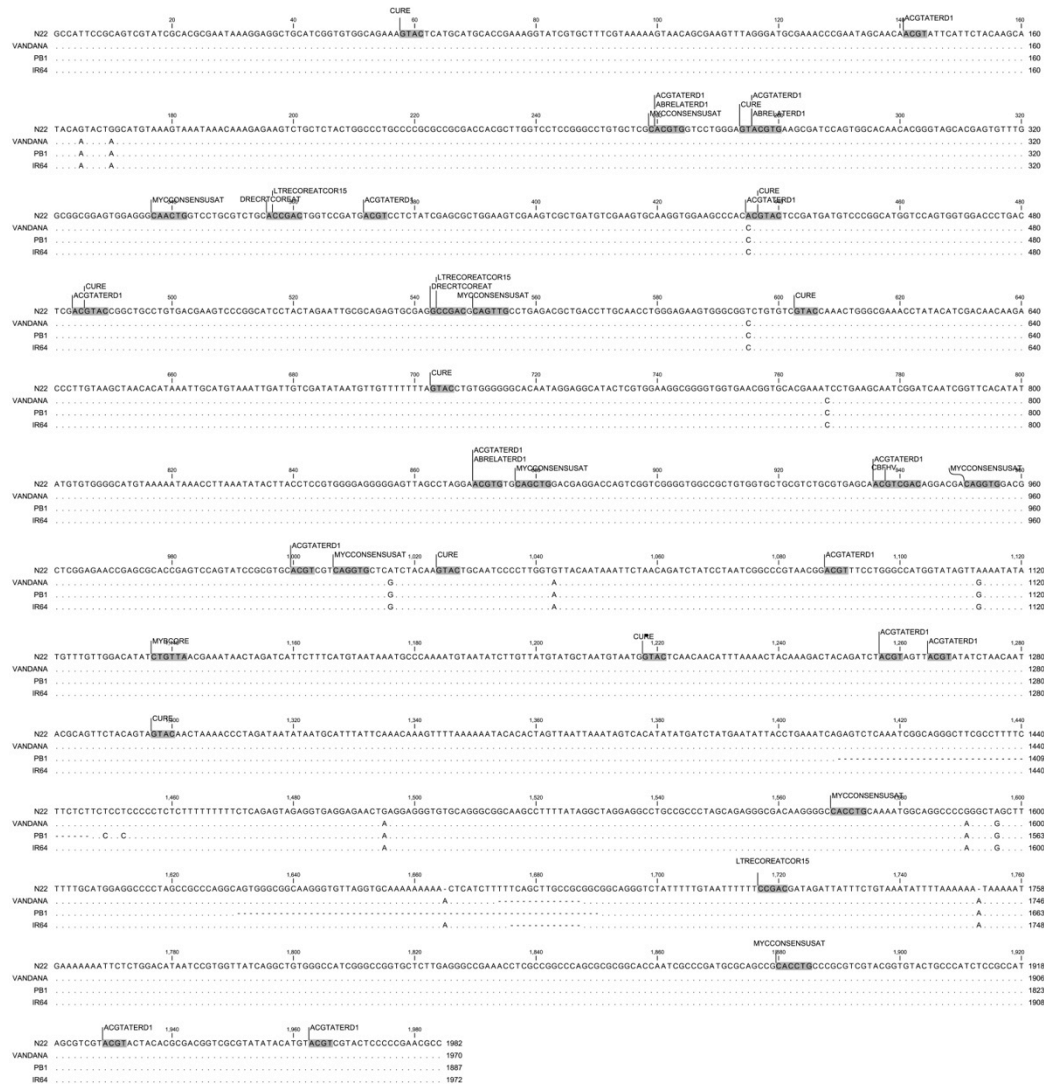

f COPT6

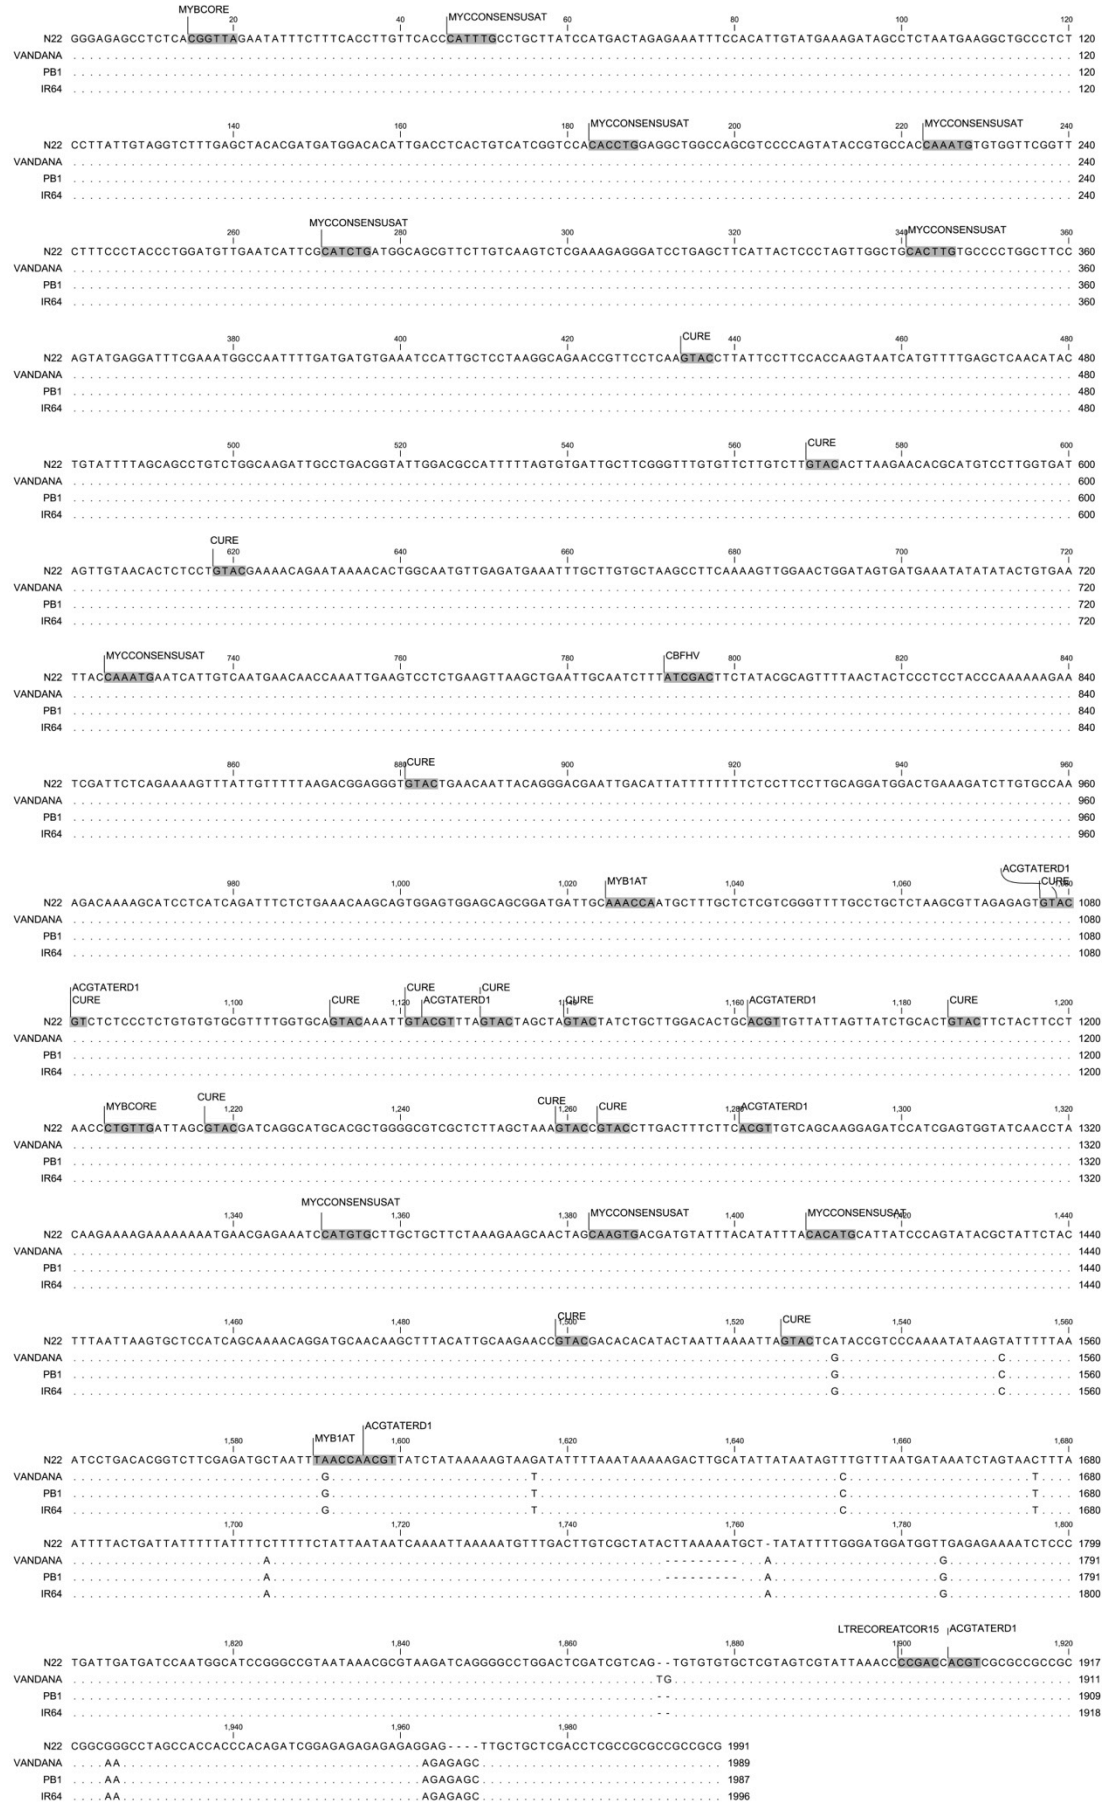

g COPT7

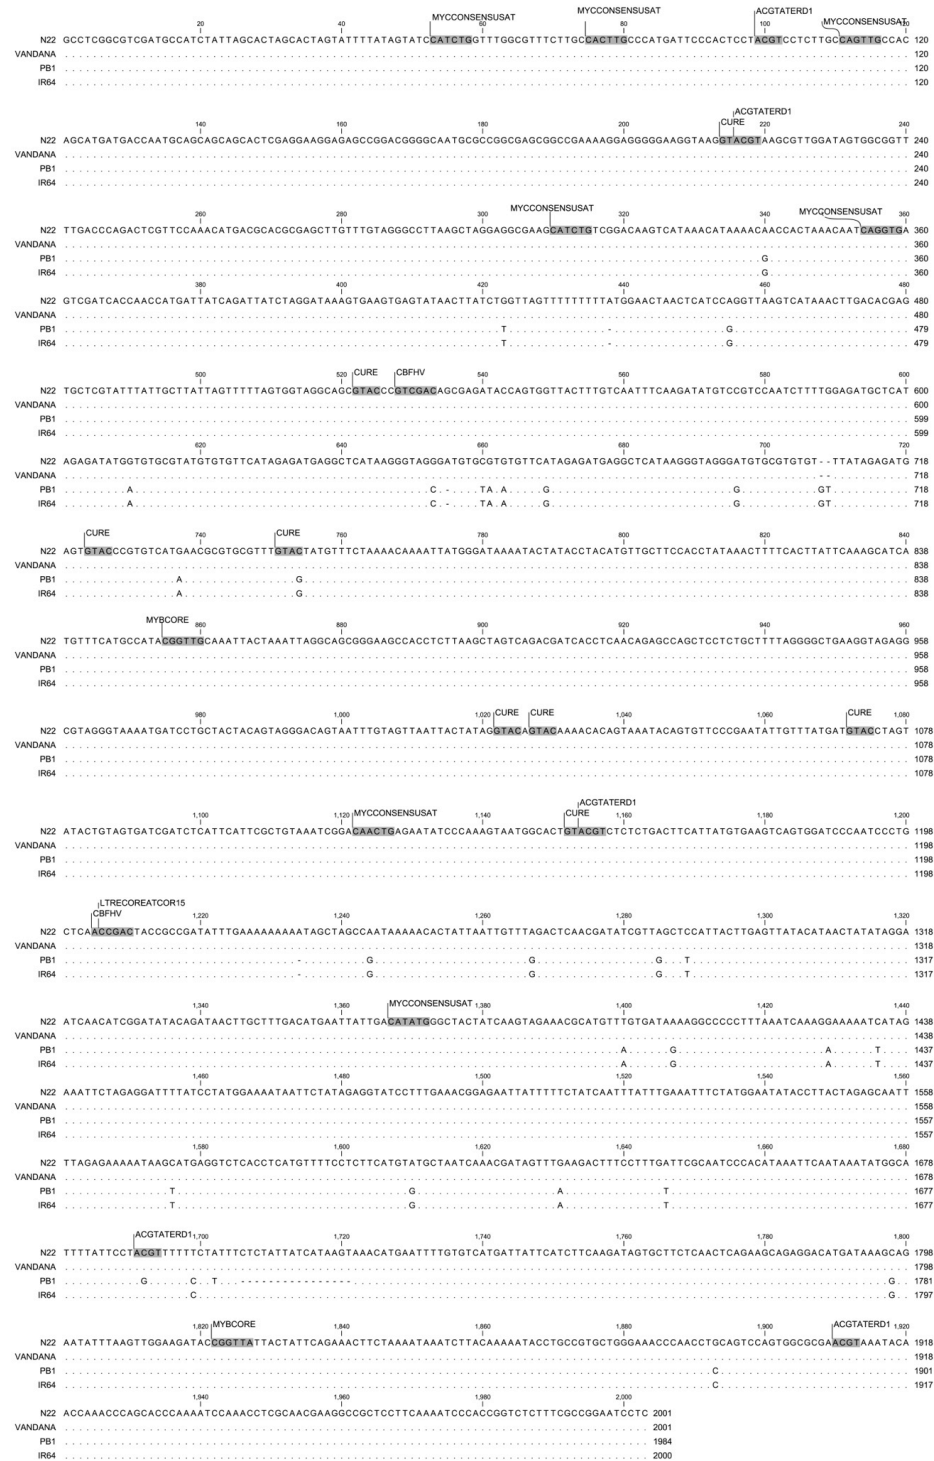

**Supplementary Fig. S14.** Comparative sequence alignment of upstream regulatory region of the seven rice copper transporters. Sequence alignment of 2kb upstream region of (a) COPT1, (b) COPT2, (c) COPT3, (d) COPT4, (e) COPT5, (f) COPT6, (g) COPT7 in four cultivars namely N22, Vandana, PB1 and IR64. Dots (.) represents the identical sequence, dashes (-) represents gaps and the cis-acting elements associated with stress were highlighted

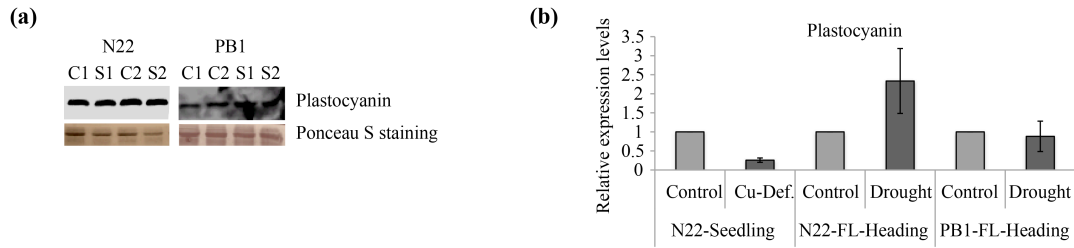

**Supplementary Fig. 15. Differential copper homeostasis does not modulate plastocyanin levels but affects ROS homeostasis.** (a) Quantitative immunoblot showing the plastocyanin protein levels in N22 and PB1 flag leaf under control (C) and drought stress (S) conditions. Ponceau S staining was used to show the equal loading of samples. (b) Relative expression analysis of plastocyanin in N22 seedlings under copper starvation and in N22 and PB1 flag leaf under drought. Three biological with three technical replicates were analyzed.

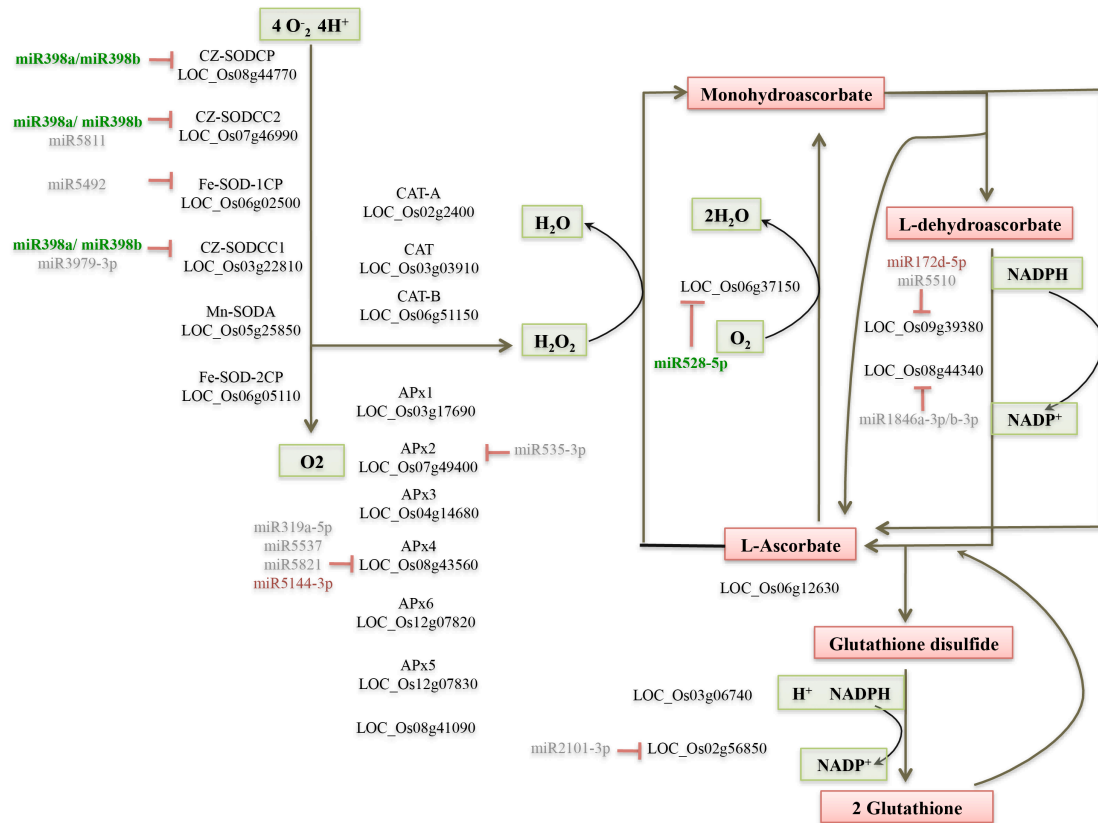

**Supplementary Fig. S16.** miRNA-mediated regulation of the pathways involved in the acquisition of ROS detoxification of ROS through removal of superoxide ions and ascorbate glutathione cycle. All genes were searched for putative targeting miRNA in the PARE data and the miRNA in green are significantly upregulated in N22 flag leaf while downregulated in PB1 flag leaf. miRNA in red are low in abundance but downregulated in N22 flag leaf and upregulated in PB1 flag leaf.

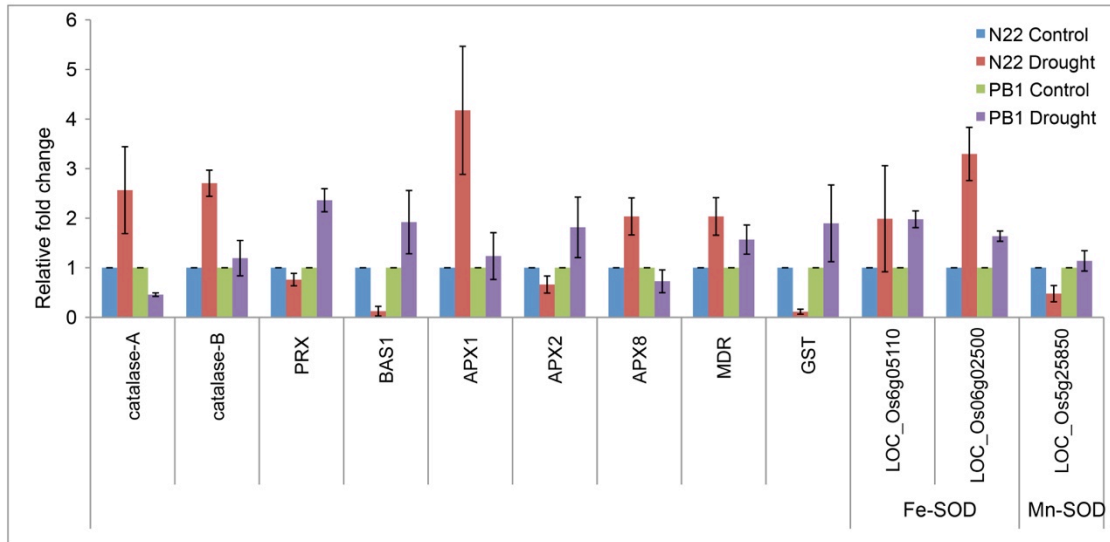

**Supplementary Fig. S17.** Expression analysis of genes involved in ROS homeostasis. qRT-PCR analysis of genes involved in the maintenance of ROS homeostasis in the flag leaf of N22 and PB1 under drought. Data represents the analyzed value of at least three biological and technical replicate. Error bars represents the standard error.

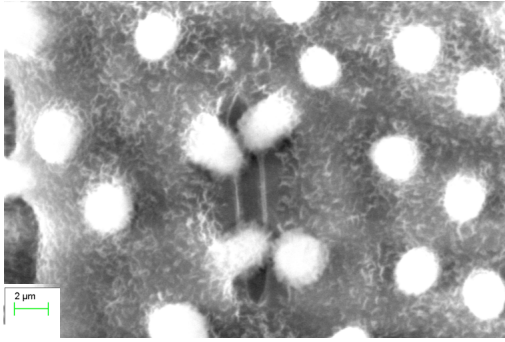

Open stomata

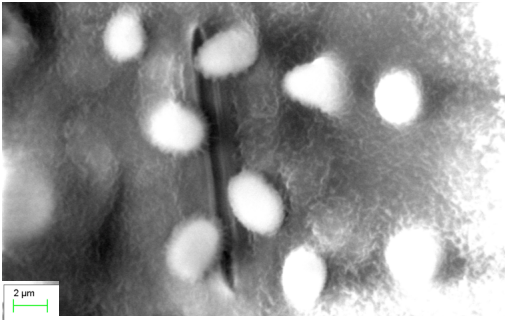

Partially-open stomata

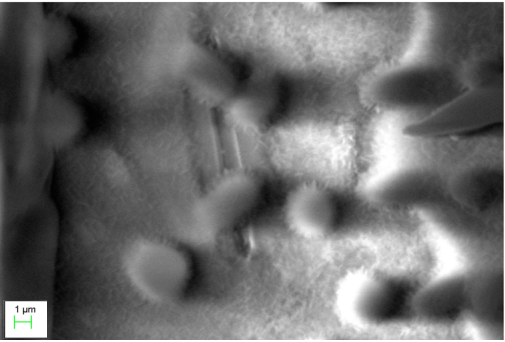

Completely closed stomata

**Supplementary Fig. S18.** Electron micrographs showing the completely open, partially open and closed stomata in PB1 flag leaf.
